# Supplementary material
Source: PubMed Central journal article supplement (PMC3553829)
Supplement: JB.01253-12_zjb999092360so1.pdf [file JB.01253-12_zjb999092360so1.pdf]

**Supplementary Table 1. Proteomic analysis of *P. aeruginosa* OMVs produced by wt and *oprF* mutant cells.** Proteins identified by LC-MS/MS. The table displays data from two biological replicates for both the wt (labeled WT1 and WT2) and the *oprF* mutant (labeled oprF1, and oprF2). The column terms are abbreviated: ProtID is Protein ID; ProtLen is Protein length; SpCount is Spectral count; APEX is APEX score; FC is Fold change (*oprF* mutant / wt); log<sub>2</sub>FC is log<sub>2</sub> fold change; UpDown indicates whether the protein is increased (Up) or decreased (Down) in the *oprF* mutant (>2 fold-change, false discovery rate (FDR) < 0.01); Product is the protein product name (from the PseudoCAP database); PCAP Function is the protein function (from the PseudoCAP database); Localization is protein localization information (from the PseudoCAP database).
