# Supplementary material
Source: PubMed Central journal article supplement (PMC3553829)
Supplement: JB.01253-12_zjb999092360so2.pdf [file JB.01253-12_zjb999092360so2.pdf]

**Supplementary Table 1**

**Key terms**

ProtID - Protein ID  
 ProtLen - Protein length  
 SpCount - Spectral count  
 APEX - APEX score  
 FC - Fold change (*oprF* mutant / wt)  
 log2FC - log2(Fold change)  
 UpDown - Whether the protein is increased (Up) or decreased (Down) in the *oprF* mutant (>2 fold-change, FDR < 0.01)  
 Product - Protein product name (from PseudoCAP database)  
 PCAP Function - Protein function  
 Localization - Protein localization information (from PseudoCAP database)

| ProtID          | ProtLen | WT1 SpCount | WT2 SpCount | oprF1 SpCount | oprF2 SpCount | WT1 APEX | WT2 APEX | oprF1 APEX | oprF2 APEX | WT avg APEX | oprF avg APEX | FC (wt/oprF) | log2FC (wt/oprF) | UpDown | Product                                                        | PCAP Function                                             | Localization        |
|-----------------|---------|-------------|-------------|---------------|---------------|----------|----------|------------|------------|-------------|---------------|--------------|------------------|--------|----------------------------------------------------------------|-----------------------------------------------------------|---------------------|
| PA14_08110      | 36      | 2.0         | 3.0         | 0.0           | 0.0           | 32.54    | 12.38    | 0.00       | 0.00       | 22.46       | 0.00          | 1024.0       | 10.0             | NA     | hypothetical protein                                           | Hypothetical, unclassified, unknown                       | Cytoplasmic         |
| PA14_08240      | 611     | 11.0        | 3.0         | 0.0           | 0.0           | 17.95    | 1.24     | 0.00       | 0.00       | 9.60        | 0.00          | 1024.0       | 10.0             | Down   | hypothetical protein                                           | Related to phage, transposon, or plasmid                  | Periplasmic         |
| PA14_08930 rpmC | 63      | 9.0         | 42.0        | 0.0           | 0.0           | 52.55    | 62.19    | 0.00       | 0.00       | 57.37       | 0.00          | 1024.0       | 10.0             | Down   | 50S ribosomal protein L29                                      | Translation, post-translational modification, degradation | Cytoplasmic         |
| PA14_15780      | 570     | 1.0         | 1.0         | 0.0           | 0.0           | 1.88     | 0.48     | 0.00       | 0.00       | 1.18        | 0.00          | 1024.0       | 10.0             | NA     | N-Acetyl-D-Glucosamine phosphotransferase system transporter   | Transport of small molecules                              | CytoplasmicMembrane |
| PA14_41570 oprF | 350     | 365.0       | 770.5       | 0.0           | 0.0           | 384.61   | 205.90   | 0.00       | 0.00       | 295.25      | 0.00          | 1024.0       | 10.0             | Down   | major porin and structural outer membrane porin OprF precursor | Membrane proteins                                         | OuterMembrane       |
| PA14_65170 rpsR | 76      | 4.0         | 40.0        | 0.0           | 0.0           | 12.28    | 31.13    | 0.00       | 0.00       | 21.70       | 0.00          | 1024.0       | 10.0             | Down   | 30S ribosomal protein S18                                      | Translation, post-translational modification, degradation | Cytoplasmic         |
| PA14_66960 tatA | 82      | 2.0         | 1.0         | 0.0           | 0.0           | 9.99     | 1.27     | 0.00       | 0.00       | 5.63        | 0.00          | 1024.0       | 10.0             | NA     | twin arginine translocase protein A                            | Protein secretion/export apparatus                        | CytoplasmicMembrane |
| PA14_67680 ntrC | 476     | 1.0         | 1.0         | 0.0           | 0.0           | 1.36     | 0.35     | 0.00       | 0.00       | 0.86        | 0.00          | 1024.0       | 10.0             | NA     | two-component response regulator NtrC                          | Two-component regulatory systems                          | Cytoplasmic         |
| PA14_71970 wbpW | 479     | 1.0         | 2.0         | 0.0           | 0.0           | 2.41     | 1.22     | 0.00       | 0.00       | 1.82        | 0.00          | 1024.0       | 10.0             | NA     | GDP-mannose pyrophosphorylase                                  | Cell wall / LPS / capsule                                 | Cytoplasmic         |
| PA14_62300      | 297     | 0.0         | 173.0       | 0.0           | 1.0           | 0.00     | 112.50   | 0.00       | 0.29       | 56.25       | 0.15          | 381.3        | 8.6              | Down   | hypothetical protein                                           | Transport of small molecules                              | Unknown             |
| PA14_07980      | 119     | 0.0         | 62.0        | 0.0           | 2.0           | 0.00     | 81.67    | 0.00       | 1.19       | 40.84       | 0.60          | 68.5         | 6.1              | Down   | hypothetical protein                                           | Hypothetical, unclassified, unknown                       | Cytoplasmic         |
| PA14_64290      | 359     | 7.0         | 0.0         | 0.0           | 1.0           | 34.81    | 0.00     | 0.00       | 0.57       | 17.40       | 0.29          | 61.0         | 5.9              | Down   | putative permease of ABC transporter                           | Transport of small molecules                              | CytoplasmicMembrane |
| PA14_12760      | 449     | 2.0         | 1.0         | 0.0           | 0.5           | 2.00     | 0.25     | 0.00       | 0.06       | 1.12        | 0.03          | 39.5         | 5.3              | NA     | ATP-dependent RNA helicase                                     | Transcription, RNA processing and degradation             | Cytoplasmic         |
| PA14_51530 exoU | 687     | 131.0       | 161.0       | 8.0           | 30.5          | 127.81   | 39.84    | 2.33       | 3.42       | 83.82       | 2.87          | 29.2         | 4.9              | Down   | ExoU                                                           | Secreted Factors (toxins, enzymes, alginate)              | Extracellular       |
| PA14_73290 atpF | 156     | 0.0         | 110.0       | 0.0           | 8.5           | 0.00     | 56.32    | 0.00       | 1.97       | 28.16       | 0.99          | 28.6         | 4.8              | Down   | F0F1 ATP synthase subunit B                                    | Energy metabolism                                         | CytoplasmicMembrane |
| PA14_08020      | 108     | 0.0         | 6.0         | 0.0           | 0.5           | 0.00     | 8.38     | 0.00       | 0.32       | 4.19        | 0.16          | 26.5         | 4.7              | NA     | putative bacteriophage protein                                 | Related to phage, transposon, or plasmid                  | Unknown             |
| PA14_31620      | 464     | 9.0         | 4.0         | 1.0           | 1.0           | 13.36    | 1.50     | 0.44       | 0.17       | 7.43        | 0.31          | 24.2         | 4.6              | Down   | hypothetical protein                                           | Transport of small molecules                              | CytoplasmicMembrane |
| PA14_32890      | 73      | 57.0        | 83.0        | 7.0           | 16.0          | 546.02   | 201.63   | 20.01      | 17.61      | 373.83      | 18.81         | 19.9         | 4.3              | Down   | hypothetical protein                                           | Hypothetical, unclassified, unknown                       | Unknown             |
| PA14_08740 rplJ | 166     | 35.0        | 11.0        | 1.0           | 17.0          | 93.88    | 7.48     | 0.80       | 5.24       | 50.68       | 3.02          | 16.8         | 4.1              | Down   | 50S ribosomal protein L10                                      | Translation, post-translational modification, degradation | Cytoplasmic         |
| PA14_08280      | 200     | 3.0         | 5.0         | 1.0           | 0.0           | 9.69     | 4.10     | 0.96       | 0.00       | 6.89        | 0.48          | 14.3         | 3.8              | NA     | putative bacteriophage protein                                 | Related to phage, transposon, or plasmid                  | CytoplasmicMembrane |
| PA14_57570      | 197     | 0.0         | 57.0        | 0.0           | 9.0           | 0.00     | 61.63    | 0.00       | 4.41       | 30.82       | 2.20          | 14.0         | 3.8              | Down   | putative cytochrome c reductase, iron-sulfur subun             | Putative enzymes                                          | CytoplasmicMembrane |
| PA14_08980 rpsN | 101     | 2.0         | 62.0        | 0.0           | 11.0          | 6.00     | 47.21    | 0.00       | 3.79       | 26.61       | 1.90          | 14.0         | 3.8              | Down   | 30S ribosomal protein S14                                      | Translation, post-translational modification, degradation | Cytoplasmic         |
| PA14_50270 fliD | 474     | 269.0       | 1402.5      | 53.0          | 255.5         | 248.44   | 328.48   | 14.61      | 27.11      | 288.46      | 20.86         | 13.8         | 3.8              | Down   | flagellar capping protein FliD                                 | Motility & Attachment                                     | Extracellular       |
| PA14_44020 sdhB | 235     | 35.0        | 87.0        | 7.0           | 18.5          | 65.47    | 41.27    | 3.91       | 3.98       | 53.37       | 3.94          | 13.5         | 3.8              | Down   | succinate dehydrogenase iron-sulfur subunit                    | Energy metabolism                                         | CytoplasmicMembrane |
| PA14_10090      | 303     | 0.0         | 6.0         | 0.0           | 1.0           | 0.00     | 3.87     | 0.00       | 0.29       | 1.93        | 0.15          | 13.2         | 3.7              | NA     | LysR family transcriptional regulator                          | Transcriptional regulators                                | Unknown             |
| PA14_07170 epd  | 353     | 1.0         | 2.0         | 0.0           | 1.0           | 1.95     | 0.99     | 0.00       | 0.22       | 1.47        | 0.11          | 13.1         | 3.7              | NA     | D-erythrose 4-phosphate dehydrogenase                          | Biosynthesis of cofactors, prosthetic groups and carriers | Cytoplasmic         |
| PA14_40240      | 723     | 17.0        | 1.0         | 3.0           | 4.0           | 21.09    | 0.32     | 1.11       | 0.57       | 10.70       | 0.84          | 12.7         | 3.7              | Down   | putative ATP-binding/permease fusion ABC transporter           | Protein secretion/export apparatus                        | CytoplasmicMembrane |
| PA14_10360      | 99      | 0.0         | 162.0       | 0.0           | 35.0          | 0.00     | 927.65   | 0.00       | 90.78      | 463.83      | 45.39         | 10.2         | 3.4              | Down   | hypothetical protein                                           | Hypothetical, unclassified, unknown                       | Unknown             |
| PA14_48940 coaB | 82      | 0.0         | 9.0         | 0.0           | 2.0           | 0.00     | 52.07    | 0.00       | 5.24       | 26.03       | 2.62          | 9.9          | 3.3              | Down   | coat protein B of bacteriophage P1)                            | Related to phage, transposon, or plasmid                  | Unknown             |

|                 |     |      |       |      |      |        |        |       |       |        |       |     |     |      |                                                            |                                                           |                     |
|-----------------|-----|------|-------|------|------|--------|--------|-------|-------|--------|-------|-----|-----|------|------------------------------------------------------------|-----------------------------------------------------------|---------------------|
| PA14_50360 figK | 683 | 4.5  | 86.0  | 0.0  | 23.5 | 5.58   | 27.02  | 0.00  | 3.35  | 16.30  | 1.67  | 9.7 | 3.3 | Down | flagellar hook-associated protein FigK                     | Motility & Attachment                                     | OuterMembrane       |
| PA14_44030 sdhA | 590 | 20.0 | 26.0  | 1.0  | 23.0 | 24.44  | 8.06   | 0.36  | 3.23  | 16.25  | 1.80  | 9.0 | 3.2 | Down | succinate dehydrogenase flavoprotein subunit               | Energy metabolism                                         | CytoplasmicMembrane |
| PA14_30490      | 360 | 0.0  | 4.0   | 0.0  | 1.0  | 0.00   | 2.31   | 0.00  | 0.26  | 1.15   | 0.13  | 8.8 | 3.1 | NA   | putative lavin-dependent oxidoreductase                    | Energy metabolism                                         | Unknown             |
| PA14_51810      | 248 | 1.0  | 0.0   | 0.0  | 1.0  | 7.82   | 0.00   | 0.00  | 0.90  | 3.91   | 0.45  | 8.7 | 3.1 | NA   | hypothetical protein                                       | Hypothetical, unclassified, unknown                       | Cytoplasmic         |
| PA14_59540      | 749 | 5.0  | 0.0   | 2.0  | 0.0  | 5.21   | 0.00   | 0.62  | 0.00  | 2.61   | 0.31  | 8.4 | 3.1 | NA   | hypothetical protein                                       | Related to phage, transposon, or plasmid                  | Cytoplasmic         |
| PA14_09010 rplR | 116 | 28.5 | 56.0  | 9.0  | 24.0 | 74.81  | 37.28  | 7.05  | 7.24  | 56.04  | 7.14  | 7.8 | 3.0 | Down | 50S ribosomal protein L18                                  | Translation, post-translational modification, degradation | Cytoplasmic         |
| PA14_66760      | 231 | 18.0 | 74.0  | 11.0 | 14.0 | 62.14  | 64.78  | 11.33 | 5.55  | 63.46  | 8.44  | 7.5 | 2.9 | Down | hypothetical protein                                       | Cell division                                             | CytoplasmicMembrane |
| PA14_23280 pheA | 365 | 6.0  | 6.0   | 3.0  | 1.0  | 10.16  | 2.58   | 1.52  | 0.19  | 6.37   | 0.85  | 7.5 | 2.9 | Down | chorismate mutase                                          | Amino acid biosynthesis and metabolism                    | Cytoplasmic         |
| PA14_00300 picB | 328 | 81.0 | 159.0 | 23.0 | 84.0 | 330.09 | 164.32 | 27.97 | 39.32 | 247.21 | 33.65 | 7.4 | 2.9 | Down | phospholipase C, PicB                                      | Hypothetical, unclassified, unknown                       | Unknown             |
| PA14_08990 rpsH | 130 | 10.0 | 16.0  | 1.0  | 14.0 | 24.61  | 9.99   | 0.73  | 3.96  | 17.30  | 2.35  | 7.4 | 2.9 | Down | 30S ribosomal protein S8                                   | Translation, post-translational modification, degradation | Cytoplasmic         |
| PA14_62810 secG | 129 | 5.0  | 9.0   | 2.0  | 4.0  | 29.19  | 13.33  | 3.48  | 2.68  | 21.26  | 3.08  | 6.9 | 2.8 | Down | preprotein translocase subunit SecG                        | Protein secretion/export apparatus                        | CytoplasmicMembrane |
| PA14_55380      | 544 | 0.0  | 8.0   | 1.0  | 0.0  | 0.00   | 2.75   | 0.40  | 0.00  | 1.37   | 0.20  | 6.8 | 2.8 | NA   | hypothetical protein                                       | Hypothetical, unclassified, unknown                       | OuterMembrane       |
| PA14_64750      | 446 | 0.0  | 3.0   | 0.0  | 1.0  | 0.00   | 2.78   | 0.00  | 0.42  | 1.39   | 0.21  | 6.6 | 2.7 | NA   | putative MFS transporter                                   | Transport of small molecules                              | CytoplasmicMembrane |
| PA14_08710 nusG | 177 | 17.0 | 0.0   | 9.0  | 0.0  | 47.68  | 0.00   | 7.53  | 0.00  | 23.84  | 3.77  | 6.3 | 2.7 | Down | transcription antitermination protein NusG                 | Transcription, RNA processing and degradation             | Cytoplasmic         |
| PA14_15960 fhh  | 457 | 7.0  | 0.0   | 3.0  | 2.0  | 13.04  | 0.00   | 1.67  | 0.43  | 6.52   | 1.05  | 6.2 | 2.6 | NA   | signal recognition particle protein Fhh                    | Protein secretion/export apparatus                        | CytoplasmicMembrane |
| PA14_08880 rplB | 273 | 11.0 | 40.0  | 0.0  | 30.0 | 13.35  | 12.31  | 0.00  | 4.18  | 12.83  | 2.09  | 6.1 | 2.6 | Down | 50S ribosomal protein L2                                   | Translation, post-translational modification, degradation | Cytoplasmic         |
| PA14_65030      | 231 | 37.0 | 33.0  | 22.0 | 9.0  | 87.94  | 19.89  | 15.61 | 2.46  | 53.92  | 9.03  | 6.0 | 2.6 | Down | hypothetical protein                                       | Membrane proteins                                         | OuterMembrane       |
| PA14_48140      | 414 | 16.0 | 60.0  | 0.0  | 48.0 | 80.10  | 76.18  | 0.00  | 27.61 | 78.14  | 13.80 | 5.7 | 2.5 | Down | hypothetical protein                                       | Hypothetical, unclassified, unknown                       | Unknown             |
| PA14_25610      | 192 | 1.0  | 0.5   | 0.5  | 0.5  | 4.05   | 0.51   | 0.60  | 0.23  | 2.28   | 0.42  | 5.5 | 2.5 | NA   | Mar-like protein                                           | Cell division                                             | Cytoplasmic         |
| PA14_52750 aotP | 254 | 0.0  | 6.0   | 0.0  | 2.5  | 0.00   | 3.70   | 0.00  | 0.70  | 1.85   | 0.35  | 5.3 | 2.4 | NA   | arginine/ornithine transport protein AotP                  | Transport of small molecules                              | CytoplasmicMembrane |
| PA14_14630 secD | 620 | 1.0  | 11.0  | 1.0  | 4.0  | 0.94   | 2.64   | 0.28  | 0.43  | 1.79   | 0.36  | 5.0 | 2.3 | Down | preprotein translocase subunit SecD                        | Protein secretion/export apparatus                        | CytoplasmicMembrane |
| PA14_53820      | 255 | 16.0 | 2.0   | 1.0  | 27.0 | 33.09  | 1.05   | 0.62  | 6.41  | 17.07  | 3.52  | 4.9 | 2.3 | NA   | hypothetical protein                                       | Hypothetical, unclassified, unknown                       | Cytoplasmic         |
| PA14_08920 rplP | 137 | 74.0 | 30.0  | 39.5 | 52.0 | 128.03 | 13.16  | 20.40 | 10.34 | 70.60  | 15.37 | 4.6 | 2.2 | Down | 50S ribosomal protein L16                                  | Translation, post-translational modification, degradation | Cytoplasmic         |
| PA14_70940 betA | 561 | 0.0  | 2.0   | 0.0  | 1.0  | 0.00   | 0.69   | 0.00  | 0.16  | 0.35   | 0.08  | 4.4 | 2.2 | NA   | choline dehydrogenase                                      | Amino acid biosynthesis and metabolism                    | CytoplasmicMembrane |
| PA14_24380      | 543 | 0.0  | 14.0  | 0.0  | 7.0  | 0.00   | 5.92   | 0.00  | 1.34  | 2.96   | 0.67  | 4.4 | 2.1 | NA   | hypothetical protein                                       | Hypothetical, unclassified, unknown                       | Unknown             |
| PA14_12900      | 93  | 0.0  | 6.0   | 0.0  | 3.0  | 0.00   | 5.19   | 0.00  | 1.18  | 2.59   | 0.59  | 4.4 | 2.1 | NA   | putative DNA binding protein                               | DNA replication, recombination, modification and repair   | Cytoplasmic         |
| PA14_07560 rpsU | 71  | 0.0  | 4.0   | 0.0  | 2.0  | 0.00   | 3.21   | 0.00  | 0.73  | 1.60   | 0.36  | 4.4 | 2.1 | NA   | 30S ribosomal protein S21                                  | Translation, post-translational modification, degradation | Cytoplasmic         |
| PA14_14610 yajC | 112 | 0.0  | 2.0   | 0.0  | 1.0  | 0.00   | 3.02   | 0.00  | 0.69  | 1.51   | 0.34  | 4.4 | 2.1 | NA   | preprotein translocase subunit YajC                        | Protein secretion/export apparatus                        | CytoplasmicMembrane |
| PA14_41590      | 274 | 0.0  | 1.0   | 0.0  | 0.5  | 0.00   | 0.84   | 0.00  | 0.19  | 0.42   | 0.10  | 4.4 | 2.1 | NA   | putative cytoplasmic membrane protein                      | Membrane proteins                                         | CytoplasmicMembrane |
| PA14_54450 nadB | 538 | 0.0  | 2.0   | 0.0  | 1.0  | 0.00   | 0.79   | 0.00  | 0.18  | 0.40   | 0.09  | 4.4 | 2.1 | NA   | L-aspartate oxidase                                        | Biosynthesis of cofactors, prosthetic groups and carriers | Cytoplasmic         |
| PA14_70190 rpmB | 78  | 2.0  | 2.0   | 0.0  | 5.0  | 11.38  | 2.88   | 0.00  | 3.27  | 7.13   | 1.63  | 4.4 | 2.1 | NA   | 50S ribosomal protein L28                                  | Translation, post-translational modification, degradation | Cytoplasmic         |
| PA14_17180 pxD  | 353 | 1.0  | 0.0   | 0.0  | 2.0  | 3.38   | 0.00   | 0.00  | 0.78  | 1.69   | 0.39  | 4.4 | 2.1 | NA   | UDP-3-O-[3-hydroxymyristoyl] glucosamine N-acyltransferase | Cell wall / LPS / capsule                                 | Cytoplasmic         |
| PA14_23830 fimV | 924 | 2.0  | 1.0   | 0.0  | 5.0  | 2.45   | 0.31   | 0.00  | 0.70  | 1.38   | 0.35  | 3.9 | 2.0 | NA   | pilus assembly protein                                     | Motility & Attachment                                     | Periplasmic         |
| PA14_50810      | 293 | 4.0  | 3.0   | 3.0  | 3.0  | 6.65   | 1.26   | 1.49  | 0.57  | 3.96   | 1.03  | 3.8 | 1.9 | NA   | hypothetical protein                                       | Membrane proteins                                         | OuterMembrane       |
| PA14_23420      | 722 | 0.0  | 19.0  | 0.0  | 11.0 | 0.00   | 5.12   | 0.00  | 1.34  | 2.56   | 0.67  | 3.8 | 1.9 | Down | putative zinc-binding dehydrogenase                        | Cell wall / LPS / capsule                                 | Cytoplasmic         |
| PA14_08030      | 295 | 16.0 | 15.0  | 0.0  | 46.0 | 51.02  | 12.13  | 0.00  | 16.85 | 31.57  | 8.42  | 3.8 | 1.9 | NA   | putative phage baseplate assembly protein                  | Related to phage, transposon, or plasmid                  | Cytoplasmic         |
| PA14_08180      | 120 | 0.0  | 49.0  | 0.0  | 29.0 | 0.00   | 87.02  | 0.00  | 23.33 | 43.51  | 11.66 | 3.7 | 1.9 | Down | hypothetical protein                                       | Hypothetical, unclassified, unknown                       | Unknown             |
| PA14_17470      | 297 | 1.0  | 54.0  | 0.0  | 36.0 | 2.70   | 37.00  | 0.00  | 11.17 | 19.85  | 5.59  | 3.6 | 1.8 | Down | hypothetical protein                                       | Cell wall / LPS / capsule                                 | OuterMembrane       |
| PA14_22440      | 610 | 0.0  | 4.0   | 1.0  | 0.0  | 0.00   | 1.38   | 0.41  | 0.00  | 0.69   | 0.20  | 3.4 | 1.8 | NA   | putative ATP-binding/permease fusion ABC transporter       | Transport of small molecules                              | CytoplasmicMembrane |
| PA14_08210      | 164 | 20.0 | 26.0  | 19.0 | 20.0 | 165.75 | 54.65  | 47.00 | 19.04 | 110.20 | 33.02 | 3.3 | 1.7 | Down | hypothetical protein                                       | Related to phage, transposon, or plasmid                  | Unknown             |
| PA14_42060      | 304 | 0.0  | 3.0   | 0.0  | 2.0  | 0.00   | 1.43   | 0.00  | 0.43  | 0.71   | 0.22  | 3.3 | 1.7 | NA   | putative transcriptional regulator                         | Transcriptional regulators                                | Cytoplasmic         |
| PA14_09090 rpsK | 129 | 28.0 | 37.5  | 26.0 | 37.5 | 52.64  | 17.88  | 14.59 | 8.10  | 35.26  | 11.34 | 3.1 | 1.6 | Down | 30S ribosomal protein S11                                  | Translation, post-translational modification, degradation | Cytoplasmic         |

|                  |      |       |        |       |       |        |        |        |        |        |        |     |     |      |                                            |                                                           |                     |
|------------------|------|-------|--------|-------|-------|--------|--------|--------|--------|--------|--------|-----|-----|------|--------------------------------------------|-----------------------------------------------------------|---------------------|
| PA14_28680 rpIT  | 118  | 28.0  | 33.0   | 24.0  | 41.0  | 133.25 | 39.83  | 34.09  | 22.41  | 86.54  | 28.25  | 3.1 | 1.6 | Down | 50S ribosomal protein L20                  | Translation, post-translational modification, degradation | Cytoplasmic         |
| PA14_08150       | 329  | 0.0   | 25.0   | 3.0   | 10.5  | 0.00   | 10.74  | 1.52   | 2.04   | 5.37   | 1.78   | 3.0 | 1.6 | Down | putative phage late control gene D protein | Related to phage, transposon, or plasmid                  | Cytoplasmic         |
| PA14_26020       | 536  | 309.0 | 1289.0 | 423.5 | 858.0 | 485.63 | 513.75 | 198.64 | 154.90 | 499.69 | 176.77 | 2.8 | 1.5 | Down | putative aminopeptidase                    | Secreted Factors (toxins, enzymes, alginate)              | Extracellular       |
| PA14_14550       | 135  | 0.0   | 85.0   | 0.0   | 67.5  | 0.00   | 251.05 | 0.00   | 90.31  | 125.53 | 45.15  | 2.8 | 1.5 | Down | hypothetical protein                       | Hypothetical, unclassified, unknown                       | Unknown             |
| PA14_09130 rpIQ  | 129  | 44.0  | 4.0    | 51.0  | 9.0   | 114.55 | 2.64   | 39.62  | 2.69   | 58.59  | 21.16  | 2.8 | 1.5 | NA   | 50S ribosomal protein L17                  | Translation, post-translational modification, degradation | Cytoplasmic         |
| PA14_08870 rpIW  | 99   | 19.0  | 23.0   | 22.0  | 21.0  | 52.42  | 16.09  | 18.12  | 6.66   | 34.26  | 12.39  | 2.8 | 1.5 | Down | 50S ribosomal protein L23                  | Translation, post-translational modification, degradation | Cytoplasmic         |
| PA14_17060 rpsB  | 246  | 6.0   | 67.5   | 2.0   | 68.0  | 8.75   | 24.97  | 0.87   | 11.39  | 16.86  | 6.13   | 2.8 | 1.5 | Down | 30S ribosomal protein S2                   | Translation, post-translational modification, degradation | Cytoplasmic         |
| PA14_44350       | 202  | 0.0   | 5.0    | 0.0   | 4.0   | 0.00   | 5.69   | 0.00   | 2.06   | 2.85   | 1.03   | 2.8 | 1.5 | NA   | putative cytochrome c oxidase subunit      | Energy metabolism                                         | Cytoplasmic         |
| PA14_48060 aprA  | 479  | 154.0 | 791.0  | 81.5  | 941.5 | 503.36 | 655.67 | 79.50  | 353.51 | 579.52 | 216.51 | 2.7 | 1.4 | Down | alkaline metalloproteinase precursor       | Secreted Factors (toxins, enzymes, alginate)              | Extracellular       |
| PA14_66310 aceF  | 547  | 33.0  | 33.0   | 37.0  | 40.0  | 22.34  | 5.67   | 7.48   | 3.11   | 14.01  | 5.29   | 2.7 | 1.4 | Down | dihydroipoamide acetyltransferase          | Energy metabolism                                         | Cytoplasmic         |
| PA14_08900 rpIV  | 110  | 21.0  | 36.0   | 10.5  | 73.0  | 38.47  | 16.72  | 5.74   | 15.36  | 27.60  | 10.55  | 2.6 | 1.4 | NA   | 50S ribosomal protein L22                  | Translation, post-translational modification, degradation | Cytoplasmic         |
| PA14_57580 rpsI  | 130  | 17.0  | 76.5   | 34.0  | 35.0  | 51.74  | 59.05  | 30.89  | 12.24  | 55.40  | 21.56  | 2.6 | 1.4 | Down | 30S ribosomal protein S9                   | Translation, post-translational modification, degradation | Cytoplasmic         |
| PA14_73230 atpC  | 141  | 9.0   | 10.0   | 8.5   | 17.0  | 29.42  | 8.29   | 8.29   | 6.38   | 18.85  | 7.34   | 2.6 | 1.4 | NA   | F0F1 ATP synthase subunit epsilon          | Energy metabolism                                         | Cytoplasmic         |
| PA14_73300 atpE  | 85   | 0.0   | 8.0    | 0.0   | 7.0   | 0.00   | 128.27 | 0.00   | 50.84  | 64.13  | 25.42  | 2.5 | 1.3 | NA   | F0F1 ATP synthase subunit C                | Energy metabolism                                         | CytoplasmicMembrane |
| PA14_65370 amiB  | 475  | 11.0  | 24.0   | 17.0  | 15.0  | 16.09  | 8.90   | 7.42   | 2.52   | 12.50  | 4.97   | 2.5 | 1.3 | Down | N-acetylmuramoyl-L-alanine amidase         | Cell wall / LPS / capsule                                 | OuterMembrane       |
| PA14_08070       | 386  | 247.0 | 393.0  | 281.0 | 486.0 | 555.46 | 224.13 | 188.60 | 125.55 | 389.79 | 157.07 | 2.5 | 1.3 | Down | putative phage tail sheath protein         | Related to phage, transposon, or plasmid                  | Unknown             |
| PA14_08810 rpsG  | 156  | 95.0  | 58.5   | 134.0 | 43.0  | 105.22 | 16.43  | 44.29  | 5.47   | 60.82  | 24.88  | 2.4 | 1.3 | Down | 30S ribosomal protein S7                   | Translation, post-translational modification, degradation | Cytoplasmic         |
| PA14_09100 rpsD  | 206  | 34.0  | 136.0  | 61.0  | 91.5  | 35.24  | 35.75  | 18.87  | 10.89  | 35.49  | 14.88  | 2.4 | 1.3 | Down | 30S ribosomal protein S4                   | Translation, post-translational modification, degradation | Cytoplasmic         |
| PA14_08090       | 167  | 104.0 | 70.0   | 126.0 | 134.0 | 325.51 | 55.56  | 117.70 | 48.18  | 190.54 | 82.94  | 2.3 | 1.2 | Down | putative phage tail tube protein           | Related to phage, transposon, or plasmid                  | Unknown             |
| PA14_05360 pilJ  | 682  | 0.0   | 11.0   | 0.0   | 11.0  | 0.00   | 5.33   | 0.00   | 2.41   | 2.66   | 1.21   | 2.2 | 1.1 | NA   | twitching motility protein PilJ            | Chemotaxis                                                | CytoplasmicMembrane |
| PA14_10300       | 203  | 0.0   | 1.0    | 0.0   | 1.0   | 0.00   | 4.04   | 0.00   | 1.83   | 2.02   | 0.91   | 2.2 | 1.1 | NA   | putative efflux protein                    | Protein secretion/export apparatus                        | CytoplasmicMembrane |
| PA14_29030       | 411  | 0.0   | 4.0    | 0.0   | 4.0   | 0.00   | 2.01   | 0.00   | 0.91   | 1.00   | 0.45   | 2.2 | 1.1 | NA   | putative FMN oxidoreductase                | Energy metabolism                                         | Cytoplasmic         |
| PA14_14900       | 214  | 0.0   | 3.0    | 0.0   | 3.0   | 0.00   | 1.59   | 0.00   | 0.72   | 0.80   | 0.36   | 2.2 | 1.1 | NA   | hypothetical protein                       | Hypothetical, unclassified, unknown                       | Unknown             |
| PA14_18340       | 295  | 0.0   | 2.0    | 0.0   | 2.0   | 0.00   | 1.02   | 0.00   | 0.46   | 0.51   | 0.23   | 2.2 | 1.1 | NA   | hypothetical protein                       | Carbon compound catabolism                                | Cytoplasmic         |
| PA14_25090 fadA  | 391  | 0.0   | 1.0    | 0.0   | 1.0   | 0.00   | 1.01   | 0.00   | 0.46   | 0.51   | 0.23   | 2.2 | 1.1 | NA   | 3-ketoacyl-CoA thiolase                    | Fatty acid and phospholipid metabolism                    | Cytoplasmic         |
| PA14_07730 ksgA  | 268  | 0.0   | 1.0    | 0.0   | 1.0   | 0.00   | 0.68   | 0.00   | 0.31   | 0.34   | 0.15   | 2.2 | 1.1 | NA   | dimethyladenosine transferase              | Transcription, RNA processing and degradation             | Cytoplasmic         |
| PA14_55530       | 213  | 0.0   | 1.0    | 0.0   | 1.0   | 0.00   | 0.54   | 0.00   | 0.24   | 0.27   | 0.12   | 2.2 | 1.1 | NA   | putative type II secretion system protein  | Protein secretion/export apparatus                        | Cytoplasmic         |
| PA14_58840       | 209  | 0.0   | 1.0    | 0.0   | 1.0   | 0.00   | 0.51   | 0.00   | 0.23   | 0.25   | 0.12   | 2.2 | 1.1 | NA   | hypothetical protein                       | Hypothetical, unclassified, unknown                       | Cytoplasmic         |
| PA14_44420       | 471  | 0.0   | 1.0    | 0.0   | 1.0   | 0.00   | 0.51   | 0.00   | 0.23   | 0.25   | 0.11   | 2.2 | 1.1 | NA   | putative ferredoxin                        | Energy metabolism                                         | CytoplasmicMembrane |
| PA14_05540 mexB  | 1046 | 0.0   | 1.0    | 0.0   | 1.0   | 0.00   | 0.44   | 0.00   | 0.20   | 0.22   | 0.10   | 2.2 | 1.1 | NA   | RND multidrug efflux transporter MexB      | Transport of small molecules                              | CytoplasmicMembrane |
| PA14_71820       | 464  | 0.0   | 1.0    | 0.0   | 1.0   | 0.00   | 0.39   | 0.00   | 0.18   | 0.20   | 0.09   | 2.2 | 1.1 | NA   | putative peptidase                         | Putative enzymes                                          | Cytoplasmic         |
| PA14_68850 gcvP1 | 958  | 0.0   | 1.0    | 0.0   | 1.0   | 0.00   | 0.32   | 0.00   | 0.15   | 0.16   | 0.07   | 2.2 | 1.1 | NA   | glycine dehydrogenase                      | Amino acid biosynthesis and metabolism                    | Cytoplasmic         |
| PA14_54940       | 994  | 0.0   | 1.0    | 0.0   | 1.0   | 0.00   | 0.18   | 0.00   | 0.08   | 0.09   | 0.04   | 2.2 | 1.1 | NA   | putative siderophore biosynthesis enzyme   | Putative enzymes                                          | Cytoplasmic         |
| PA14_65200 mrn   | 907  | 0.0   | 1.0    | 0.0   | 1.0   | 0.00   | 0.18   | 0.00   | 0.08   | 0.09   | 0.04   | 2.2 | 1.1 | NA   | exoribonuclease RNase R                    | Transcription, RNA processing and degradation             | Cytoplasmic         |
| PA14_16100       | 406  | 15.0  | 138.5  | 31.0  | 120.0 | 40.73  | 95.36  | 25.12  | 37.43  | 68.05  | 31.27  | 2.2 | 1.1 | Down | hypothetical protein                       | Hypothetical, unclassified, unknown                       | Unknown             |
| PA14_73280 atpH  | 178  | 3.0   | 4.0    | 0.0   | 17.0  | 8.64   | 2.92   | 0.00   | 5.63   | 5.78   | 2.81   | 2.1 | 1.0 | NA   | F0F1 ATP synthase subunit delta            | Energy metabolism                                         | Cytoplasmic         |
| PA14_59220       | 498  | 13.0  | 36.0   | 16.0  | 53.5  | 14.38  | 10.10  | 5.28   | 6.80   | 12.24  | 6.04   | 2.0 | 1.0 | NA   | pyocin S5                                  | Secreted Factors (toxins, enzymes, alginate)              | Extracellular       |
| PA14_62190       | 259  | 0.0   | 63.0   | 0.0   | 69.0  | 0.00   | 144.30 | 0.00   | 71.59  | 72.15  | 35.80  | 2.0 | 1.0 | Down | hypothetical protein                       | Hypothetical, unclassified, unknown                       | Extracellular       |
| PA14_73260 atpA  | 514  | 15.0  | 97.0   | 37.0  | 89.5  | 9.43   | 15.47  | 6.94   | 6.46   | 12.45  | 6.70   | 1.9 | 0.9 | Down | F0F1 ATP synthase subunit alpha            | Energy metabolism                                         | Cytoplasmic         |
| PA14_08050       | 691  | 31.0  | 13.0   | 49.0  | 36.0  | 45.58  | 4.85   | 21.50  | 6.08   | 25.21  | 13.79  | 1.8 | 0.9 | NA   | putative tail fiber protein                | Related to phage, transposon, or plasmid                  | Extracellular       |
| PA14_08130       | 290  | 8.0   | 15.0   | 14.5  | 19.0  | 16.48  | 7.84   | 8.92   | 4.50   | 12.16  | 6.71   | 1.8 | 0.9 | NA   | hypothetical protein                       | Related to phage, transposon, or plasmid                  | Unknown             |

|                  |      |       |        |        |        |        |        |        |        |        |        |     |     |      |                                                            |                                                                   |                     |
|------------------|------|-------|--------|--------|--------|--------|--------|--------|--------|--------|--------|-----|-----|------|------------------------------------------------------------|-------------------------------------------------------------------|---------------------|
| PA14_57010 groEL | 547  | 413.0 | 935.0  | 854.5  | 942.5  | 211.94 | 121.68 | 130.87 | 55.56  | 166.81 | 93.22  | 1.8 | 0.8 | Down | chaperonin GroEL                                           | Chaperones & heat shock proteins                                  | Cytoplasmic         |
| PA14_51750 tolQ  | 231  | 4.0   | 9.0    | 0.0    | 31.0   | 16.04  | 9.15   | 0.00   | 14.28  | 12.59  | 7.14   | 1.8 | 0.8 | NA   | TolQ protein                                               | Transport of small molecules                                      | CytoplasmicMembrane |
| PA14_73410       | 578  | 0.0   | 4.0    | 0.0    | 5.0    | 0.00   | 2.05   | 0.00   | 1.16   | 1.02   | 0.58   | 1.8 | 0.8 | NA   | putative inner membrane protein translocase component YidC | Membrane proteins                                                 | CytoplasmicMembrane |
| PA14_50290 flhC  | 488  | 550.5 | 2743.5 | 1256.5 | 2916.0 | 718.26 | 907.77 | 489.28 | 437.05 | 813.02 | 463.16 | 1.8 | 0.8 | Down | flagellin type B                                           | Motility & Attachment                                             | Extracellular       |
| PA14_49900       | 168  | 17.0  | 0.0    | 21.0   | 32.5   | 57.78  | 0.00   | 21.30  | 12.69  | 28.89  | 17.00  | 1.7 | 0.8 | Down | hypothetical protein                                       | Membrane proteins                                                 | OuterMembrane       |
| PA14_11170       | 278  | 0.0   | 2.0    | 1.0    | 0.0    | 0.00   | 1.67   | 0.98   | 0.00   | 0.83   | 0.49   | 1.7 | 0.8 | NA   | hypothetical protein                                       | Hypothetical, unclassified, unknown                               | Cytoplasmic         |
| PA14_69090       | 357  | 0.0   | 5.0    | 0.0    | 6.5    | 0.00   | 1.46   | 0.00   | 0.86   | 0.73   | 0.43   | 1.7 | 0.8 | NA   | hypothetical protein                                       | Membrane proteins                                                 | CytoplasmicMembrane |
| PA14_42290 pscH  | 143  | 1.0   | 0.0    | 2.0    | 0.0    | 4.11   | 0.00   | 2.46   | 0.00   | 2.06   | 1.23   | 1.7 | 0.7 | NA   | type III export protein PscH                               | Protein secretion/export apparatus                                | Cytoplasmic         |
| PA14_08790 rpsL  | 123  | 0.0   | 6.0    | 0.0    | 8.0    | 0.00   | 9.82   | 0.00   | 5.93   | 4.91   | 2.96   | 1.7 | 0.7 | NA   | 30S ribosomal protein S12                                  | Translation, post-translational modification, degradation         | Cytoplasmic         |
| PA14_33280 pvdL  | 4342 | 0.0   | 3.0    | 1.0    | 1.5    | 0.00   | 0.13   | 0.05   | 0.03   | 0.06   | 0.04   | 1.6 | 0.7 | NA   | peptide synthase                                           | Adaptation, Protection                                            | Unknown             |
| PA14_69660 ppL   | 46   | 9.0   | 4.0    | 16.0   | 12.0   | 234.30 | 26.41  | 124.31 | 35.89  | 130.35 | 80.10  | 1.6 | 0.7 | NA   | Lipopeptide LppL precursor                                 | Fatty acid and phospholipid metabolism; Cell wall / LPS / capsule | Unknown             |
| PA14_08730 rplA  | 231  | 23.0  | 12.5   | 46.0   | 26.5   | 30.73  | 4.24   | 18.34  | 4.07   | 17.48  | 11.21  | 1.6 | 0.6 | NA   | 50S ribosomal protein L1                                   | Translation, post-translational modification, degradation         | Cytoplasmic         |
| PA14_17600       | 136  | 0.0   | 76.0   | 0.0    | 108.5  | 0.00   | 95.20  | 0.00   | 61.56  | 47.60  | 30.78  | 1.6 | 0.6 | NA   | hypothetical protein                                       | Protein secretion/export apparatus                                | Unknown             |
| PA14_58730 pilA  | 179  | 2.0   | 108.0  | 35.0   | 76.5   | 7.71   | 105.59 | 40.27  | 33.88  | 56.65  | 37.07  | 1.5 | 0.6 | Down | type IV pilin structural subunit                           | Motility & Attachment                                             | Extracellular       |
| PA14_41170 fabI  | 265  | 0.0   | 9.0    | 0.0    | 13.0   | 0.00   | 6.22   | 0.00   | 4.07   | 3.11   | 2.04   | 1.5 | 0.6 | NA   | NADH-dependent enoyl-ACP reductase                         | Fatty acid and phospholipid metabolism                            | CytoplasmicMembrane |
| PA14_57510       | 192  | 3.0   | 121.0  | 6.0    | 179.0  | 9.68   | 98.98  | 5.78   | 66.33  | 54.33  | 36.05  | 1.5 | 0.6 | NA   | putative secreted lipoprotein                              | Fatty acid and phospholipid metabolism                            | Periplasmic         |
| PA14_17530 recA  | 346  | 22.0  | 19.5   | 30.0   | 77.5   | 28.84  | 6.48   | 11.74  | 11.67  | 17.66  | 11.70  | 1.5 | 0.6 | NA   | recombinase A                                              | DNA replication, recombination, modification and repair           | Cytoplasmic         |
| PA14_09000 rplF  | 177  | 14.0  | 19.0   | 26.0   | 42.0   | 25.35  | 8.72   | 14.05  | 8.74   | 17.04  | 11.39  | 1.5 | 0.6 | NA   | 50S ribosomal protein L6                                   | Translation, post-translational modification, degradation         | Cytoplasmic         |
| PA14_05480       | 496  | 4.0   | 1.0    | 0.0    | 25.0   | 4.33   | 0.28   | 0.00   | 3.11   | 2.30   | 1.56   | 1.5 | 0.6 | NA   | hypothetical protein                                       | Amino acid biosynthesis and metabolism                            | Unknown             |
| PA14_62720 rpsO  | 89   | 9.0   | 4.0    | 12.0   | 28.0   | 31.97  | 3.60   | 12.72  | 11.43  | 17.79  | 12.07  | 1.5 | 0.6 | NA   | 30S ribosomal protein S15                                  | Translation, post-translational modification, degradation         | Cytoplasmic         |
| PA14_69430       | 376  | 0.0   | 14.0   | 5.0    | 8.0    | 0.00   | 7.34   | 3.09   | 1.90   | 3.67   | 2.49   | 1.5 | 0.6 | NA   | hypothetical protein                                       | Biosynthesis of cofactors, prosthetic groups and carriers         | CytoplasmicMembrane |
| PA14_32950       | 580  | 0.0   | 1.0    | 0.0    | 1.5    | 0.00   | 0.32   | 0.00   | 0.21   | 0.16   | 0.11   | 1.5 | 0.6 | NA   | hypothetical protein                                       | Hypothetical, unclassified, unknown                               | Unknown             |
| PA14_33050       | 291  | 0.0   | 3.0    | 1.0    | 2.0    | 0.00   | 1.97   | 0.77   | 0.60   | 0.99   | 0.69   | 1.4 | 0.5 | NA   | hypothetical protein                                       | Hypothetical, unclassified, unknown                               | Unknown             |
| PA14_57590 rplM  | 142  | 0.0   | 44.0   | 16.0   | 26.0   | 0.00   | 27.37  | 11.71  | 7.33   | 13.69  | 9.52   | 1.4 | 0.5 | Down | 50S ribosomal protein L13                                  | Translation, post-translational modification, degradation         | Cytoplasmic         |
| PA14_12090       | 341  | 30.0  | 28.0   | 72.5   | 39.5   | 59.11  | 13.99  | 42.64  | 8.94   | 36.55  | 25.79  | 1.4 | 0.5 | NA   | RlpA family lipoprotein                                    | Hypothetical, unclassified, unknown                               | Periplasmic         |
| PA14_08220       | 115  | 0.0   | 22.0   | 0.0    | 35.0   | 0.00   | 27.25  | 0.00   | 19.64  | 13.63  | 9.82   | 1.4 | 0.5 | NA   | hypothetical protein                                       | Hypothetical, unclassified, unknown                               | Cytoplasmic         |
| PA14_09040 rplO  | 144  | 0.0   | 12.0   | 2.0    | 14.0   | 0.00   | 6.23   | 1.22   | 3.29   | 3.12   | 2.26   | 1.4 | 0.5 | NA   | 50S ribosomal protein L15                                  | Translation, post-translational modification, degradation         | Cytoplasmic         |
| PA14_02060       | 278  | 24.5  | 25.0   | 43.0   | 89.0   | 82.27  | 21.29  | 43.09  | 34.33  | 51.78  | 38.71  | 1.3 | 0.4 | NA   | hypothetical protein                                       | Membrane proteins                                                 | OuterMembrane       |
| PA14_08970 rplE  | 179  | 49.0  | 26.0   | 118.0  | 59.0   | 61.36  | 8.26   | 44.10  | 8.49   | 34.81  | 26.30  | 1.3 | 0.4 | NA   | 50S ribosomal protein L5                                   | Translation, post-translational modification, degradation         | Cytoplasmic         |
| PA14_41500       | 231  | 0.0   | 7.0    | 0.0    | 12.0   | 0.00   | 6.46   | 0.00   | 5.02   | 3.23   | 2.51   | 1.3 | 0.4 | NA   | putative lyase                                             | Putative enzymes                                                  | Unknown             |
| PA14_44620       | 108  | 0.0   | 4.0    | 0.0    | 7.0    | 0.00   | 8.80   | 0.00   | 6.98   | 4.40   | 3.49   | 1.3 | 0.3 | NA   | hypothetical protein                                       | Hypothetical, unclassified, unknown                               | Unknown             |
| PA14_25280 nqrA  | 445  | 0.0   | 4.0    | 0.0    | 7.0    | 0.00   | 1.63   | 0.00   | 1.29   | 0.81   | 0.65   | 1.3 | 0.3 | NA   | Na(+)-translocating NADH-quinone reductase subunit A       | Energy metabolism                                                 | Cytoplasmic         |
| PA14_09080 rpsM  | 118  | 39.0  | 97.0   | 65.5   | 278.0  | 84.44  | 53.26  | 42.33  | 69.14  | 68.85  | 55.74  | 1.2 | 0.3 | NA   | 30S ribosomal protein S13                                  | Translation, post-translational modification, degradation         | Cytoplasmic         |
| PA14_16000 rplS  | 116  | 36.0  | 75.5   | 108.0  | 116.0  | 69.94  | 37.20  | 62.62  | 25.89  | 53.57  | 44.25  | 1.2 | 0.3 | NA   | 50S ribosomal protein L19                                  | Transcription, RNA processing and degradation                     | Cytoplasmic         |
| PA14_40290 lasA  | 418  | 8.0   | 148.0  | 29.0   | 253.5  | 17.07  | 80.09  | 18.47  | 62.14  | 48.58  | 40.30  | 1.2 | 0.3 | NA   | LasA protease precursor                                    | Translation, post-translational modification, degradation         | OuterMembrane       |
| PA14_04710       | 143  | 18.0  | 16.0   | 35.0   | 70.5   | 108.53 | 24.46  | 62.98  | 48.83  | 66.50  | 55.91  | 1.2 | 0.3 | NA   | hypothetical protein                                       | Hypothetical, unclassified, unknown                               | Unknown             |
| PA14_14650 secF  | 306  | 2.0   | 1.0    | 1.0    | 14.0   | 7.99   | 1.01   | 1.19   | 6.42   | 4.50   | 3.81   | 1.2 | 0.2 | NA   | preprotein translocase subunit SecF                        | Protein secretion/export apparatus                                | CytoplasmicMembrane |
| PA14_35380 ptxR  | 312  | 0.0   | 3.0    | 1.0    | 3.0    | 0.00   | 1.57   | 0.62   | 0.71   | 0.79   | 0.66   | 1.2 | 0.2 | NA   | transcriptional regulator PtxR                             | Transcriptional regulators                                        | Cytoplasmic         |
| PA14_73240 atpD  | 458  | 34.0  | 54.0   | 85.0   | 150.0  | 34.40  | 13.86  | 25.67  | 17.43  | 24.13  | 21.55  | 1.1 | 0.2 | NA   | F0F1 ATP synthase subunit beta                             | Energy metabolism                                                 | Cytoplasmic         |
| PA14_18060       | 176  | 0.0   | 2.0    | 0.0    | 4.0    | 0.00   | 3.29   | 0.00   | 2.98   | 1.65   | 1.49   | 1.1 | 0.1 | NA   | hypothetical protein                                       | Energy metabolism                                                 | CytoplasmicMembrane |
| PA14_54350 lepB  | 284  | 0.0   | 4.0    | 0.0    | 8.0    | 0.00   | 2.21   | 0.00   | 2.00   | 1.11   | 1.00   | 1.1 | 0.1 | NA   | signal peptidase I                                         | Protein secretion/export apparatus                                | CytoplasmicMembrane |
| PA14_29470       | 250  | 0.0   | 2.0    | 0.0    | 4.0    | 0.00   | 1.34   | 0.00   | 1.21   | 0.67   | 0.61   | 1.1 | 0.1 | NA   | hypothetical protein                                       | Hypothetical, unclassified, unknown                               | Cytoplasmic         |
| PA14_07310       | 224  | 0.0   | 1.0    | 0.0    | 2.0    | 0.00   | 0.82   | 0.00   | 0.74   | 0.41   | 0.37   | 1.1 | 0.1 | NA   | putative hydrolase                                         | Putative enzymes                                                  | Cytoplasmic         |
| PA14_24220 ppnK  | 295  | 0.0   | 1.0    | 0.0    | 2.0    | 0.00   | 0.81   | 0.00   | 0.73   | 0.41   | 0.37   | 1.1 | 0.1 | NA   | inorganic polyphosphate/ATP-NAD kinase                     | Hypothetical, unclassified, unknown                               | Cytoplasmic         |
| PA14_11260       | 309  | 0.0   | 1.0    | 0.0    | 2.0    | 0.00   | 0.70   | 0.00   | 0.64   | 0.35   | 0.32   | 1.1 | 0.1 | NA   | putative epimerase                                         | Central intermediary metabolism                                   | Cytoplasmic         |
| PA14_69670 lysA  | 415  | 0.0   | 2.5    | 0.0    | 5.0    | 0.00   | 0.65   | 0.00   | 0.59   | 0.32   | 0.29   | 1.1 | 0.1 | NA   | diaminopimelate decarboxylase                              | Amino acid biosynthesis and metabolism                            | Cytoplasmic         |
| PA14_68810       | 454  | 0.0   | 1.0    | 0.0    | 2.0    | 0.00   | 0.33   | 0.00   | 0.30   | 0.16   | 0.15   | 1.1 | 0.1 | NA   | hypothetical protein                                       | Putative enzymes                                                  | Unknown             |

|                  |      |       |       |       |        |        |        |        |        |        |        |     |      |    |                                                                                  |                                                           |                     |
|------------------|------|-------|-------|-------|--------|--------|--------|--------|--------|--------|--------|-----|------|----|----------------------------------------------------------------------------------|-----------------------------------------------------------|---------------------|
| PA14_00030 recF  | 369  | 0.0   | 0.5   | 0.0   | 1.0    | 0.00   | 0.23   | 0.00   | 0.21   | 0.11   | 0.10   | 1.1 | 0.1  | NA | recombination protein F                                                          | DNA replication, recombination, modification and repair   | Cytoplasmic         |
| PA14_19020       | 408  | 0.0   | 3.5   | 1.0   | 4.5    | 0.00   | 1.45   | 0.49   | 0.84   | 0.72   | 0.67   | 1.1 | 0.1  | NA | hypothetical protein                                                             | Hypothetical, unclassified, unknown                       | CytoplasmicMembrane |
| PA14_60400 rpsT  | 91   | 27.0  | 16.0  | 87.0  | 30.5   | 171.69 | 25.80  | 165.10 | 22.28  | 98.74  | 93.69  | 1.1 | 0.1  | NA | 30S ribosomal protein S20                                                        | Translation, post-translational modification, degradation | Cytoplasmic         |
| PA14_21820       | 253  | 6.0   | 14.0  | 26.0  | 12.0   | 13.52  | 8.00   | 17.49  | 3.11   | 10.76  | 10.30  | 1.1 | 0.1  | NA | putative peptidyl-prolyl cis-trans isomerase, FkpP-type                          | Translation, post-translational modification, degradation | OuterMembrane       |
| PA14_08940 rpsQ  | 88   | 1.0   | 5.0   | 0.0   | 19.0   | 3.70   | 4.69   | 0.00   | 8.08   | 4.20   | 4.04   | 1.0 | 0.1  | NA | 30S ribosomal protein S17                                                        | Translation, post-translational modification, degradation | Cytoplasmic         |
| PA14_65280 hflK  | 400  | 0.0   | 13.0  | 2.0   | 23.0   | 0.00   | 4.96   | 0.90   | 3.97   | 2.48   | 2.43   | 1.0 | 0.0  | NA | protease subunit HflK                                                            | Translation, post-translational modification, degradation | Unknown             |
| PA14_47540       | 424  | 138.0 | 323.0 | 435.0 | 759.5  | 203.58 | 120.84 | 191.52 | 128.71 | 162.21 | 160.12 | 1.0 | 0.0  | Up | putative outer membrane protein precursor                                        | Membrane proteins                                         | OuterMembrane       |
| PA14_10540       | 573  | 0.0   | 8.0   | 0.0   | 18.0   | 0.00   | 2.53   | 0.00   | 2.58   | 1.26   | 1.29   | 1.0 | 0.0  | NA | putative iron-sulfur cluster-binding protein                                     | Energy metabolism                                         | CytoplasmicMembrane |
| PA14_51710 oprL  | 168  | 0.0   | 71.0  | 17.0  | 118.0  | 0.00   | 95.32  | 26.86  | 71.76  | 47.66  | 49.31  | 1.0 | -0.1 | NA | Peptidoglycan associated lipoprotein OprL precursor                              | Transport of small molecules                              | OuterMembrane       |
| PA14_61850       | 742  | 27.0  | 29.0  | 41.0  | 211.5  | 24.06  | 6.55   | 10.90  | 21.65  | 15.31  | 16.28  | 0.9 | -0.1 | Up | putative TonB-dependent receptor                                                 | Transport of small molecules                              | OuterMembrane       |
| PA14_44000 sucB  | 409  | 1.0   | 2.0   | 0.0   | 14.0   | 1.09   | 0.55   | 0.00   | 1.75   | 0.82   | 0.87   | 0.9 | -0.1 | NA | dihydroipoamide succinyltransferase                                              | Energy metabolism                                         | Cytoplasmic         |
| PA14_10380       | 99   | 0.0   | 5.0   | 0.0   | 12.0   | 0.00   | 11.31  | 0.00   | 12.30  | 5.66   | 6.15   | 0.9 | -0.1 | NA | hypothetical protein                                                             | Hypothetical, unclassified, unknown                       | Unknown             |
| PA14_09280 pchF  | 1809 | 2.0   | 1.0   | 4.0   | 11.0   | 0.97   | 0.12   | 0.58   | 0.61   | 0.55   | 0.59   | 0.9 | -0.1 | NA | pyochelin synthetase                                                             | Transport of small molecules                              | Cytoplasmic         |
| PA14_49200 oprH  | 200  | 251.5 | 625.5 | 963.5 | 1451.5 | 625.31 | 394.40 | 714.96 | 414.57 | 509.86 | 564.76 | 0.9 | -0.2 | Up | PhoP/Q and low Mg2+ inducible outer membrane prote                               | Membrane proteins                                         | OuterMembrane       |
| PA14_61390       | 195  | 33.0  | 25.5  | 125.0 | 57.0   | 101.85 | 19.96  | 115.14 | 20.21  | 60.90  | 67.67  | 0.9 | -0.2 | NA | putative lipoprotein                                                             | Fatty acid and phospholipid metabolism                    | Unknown             |
| PA14_25600       | 326  | 0.0   | 1.0   | 0.0   | 2.5    | 0.00   | 0.65   | 0.00   | 0.73   | 0.32   | 0.37   | 0.9 | -0.2 | NA | putative peptidase                                                               | Translation, post-translational modification, degradation | CytoplasmicMembrane |
| PA14_66875 phaF  | 309  | 0.0   | 1.0   | 0.0   | 2.5    | 0.00   | 0.52   | 0.00   | 0.59   | 0.26   | 0.30   | 0.9 | -0.2 | NA | polyhydroxyalkanoate synthesis protein PhaF                                      | Central intermediary metabolism                           | CytoplasmicMembrane |
| PA14_19065       | 364  | 1.0   | 0.0   | 0.0   | 10.0   | 2.94   | 0.00   | 0.00   | 3.38   | 1.47   | 1.69   | 0.9 | -0.2 | NA | hypothetical protein                                                             | Cell division                                             | CytoplasmicMembrane |
| PA14_06990       | 202  | 0.0   | 20.0  | 8.0   | 31.0   | 0.00   | 9.72   | 4.57   | 6.82   | 4.86   | 5.70   | 0.9 | -0.2 | NA | hypothetical protein                                                             | Protein secretion/export apparatus                        | Unknown             |
| PA14_66290 aceE  | 882  | 8.5   | 16.0  | 28.5  | 54.5   | 4.32   | 2.06   | 4.32   | 3.18   | 3.19   | 3.75   | 0.9 | -0.2 | NA | pyruvate dehydrogenase subunit E1                                                | Amino acid biosynthesis and metabolism                    | Cytoplasmic         |
| PA14_08040       | 177  | 0.0   | 5.0   | 0.0   | 13.0   | 0.00   | 2.95   | 0.00   | 3.48   | 1.48   | 1.74   | 0.9 | -0.2 | NA | putative phage tail protein                                                      | Related to phage, transposon, or plasmid                  | Cytoplasmic         |
| PA14_22020 minD  | 271  | 0.0   | 4.0   | 0.0   | 10.5   | 0.00   | 2.29   | 0.00   | 2.72   | 1.15   | 1.36   | 0.8 | -0.3 | NA | cell division inhibitor MinD                                                     | Cell division                                             | Cytoplasmic         |
| PA14_24770       | 109  | 0.0   | 10.0  | 0.0   | 27.0   | 0.00   | 23.78  | 0.00   | 29.08  | 11.89  | 14.54  | 0.8 | -0.3 | NA | hypothetical protein                                                             | Hypothetical, unclassified, unknown                       | Cytoplasmic         |
| PA14_11430 ribH  | 158  | 9.0   | 10.0  | 36.0  | 30.0   | 33.36  | 9.40   | 39.82  | 12.77  | 21.38  | 26.30  | 0.8 | -0.3 | NA | 6,7-dimethyl-8-ribityllumazine synthase                                          | Biosynthesis of cofactors, prosthetic groups and carriers | CytoplasmicMembrane |
| PA14_06160       | 797  | 7.0   | 1.0   | 15.5  | 37.5   | 5.78   | 0.21   | 3.82   | 3.56   | 3.00   | 3.69   | 0.8 | -0.3 | NA | putative hydroxamate-type ferrisiderophore receptor                              | Transport of small molecules                              | OuterMembrane       |
| PA14_51690       | 274  | 14.0  | 56.5  | 23.0  | 245.5  | 26.41  | 27.03  | 12.95  | 53.20  | 26.72  | 33.08  | 0.8 | -0.3 | Up | hypothetical protein                                                             | Hypothetical, unclassified, unknown                       | Periplasmic         |
| PA14_02680       | 496  | 0.0   | 2.0   | 0.0   | 5.5    | 0.00   | 0.66   | 0.00   | 0.83   | 0.33   | 0.41   | 0.8 | -0.3 | NA | putative aldehyde dehydrogenase                                                  | Energy metabolism                                         | Cytoplasmic         |
| PA14_08120       | 745  | 5.0   | 14.0  | 12.0  | 63.0   | 4.95   | 3.52   | 3.55   | 7.17   | 4.24   | 5.36   | 0.8 | -0.3 | NA | putative tail length determinant protein                                         | Related to phage, transposon, or plasmid                  | OuterMembrane       |
| PA14_44380       | 203  | 1.0   | 16.0  | 12.0  | 25.0   | 3.04   | 12.33  | 10.89  | 8.73   | 7.69   | 9.81   | 0.8 | -0.4 | NA | putative cytochrome c oxidase, cbb3-type, subunit II                             | Energy metabolism                                         | Cytoplasmic         |
| PA14_09400 phzS  | 402  | 0.0   | 2.0   | 0.0   | 6.0    | 0.00   | 1.52   | 0.00   | 2.06   | 0.76   | 1.03   | 0.7 | -0.4 | NA | hypothetical protein                                                             | Putative enzymes                                          | Cytoplasmic         |
| PA14_08000       | 171  | 0.0   | 1.0   | 0.0   | 3.0    | 0.00   | 1.11   | 0.00   | 1.51   | 0.55   | 0.75   | 0.7 | -0.4 | NA | hypothetical protein                                                             | Hypothetical, unclassified, unknown                       | Unknown             |
| PA14_11270 oprG  | 232  | 53.0  | 322.5 | 134.5 | 1304.0 | 241.81 | 373.15 | 183.15 | 683.45 | 307.48 | 433.30 | 0.7 | -0.5 | Up | outer membrane protein OprG precursor                                            | Membrane proteins                                         | OuterMembrane       |
| PA14_09020 rpsE  | 166  | 12.0  | 51.0  | 72.0  | 119.5  | 25.29  | 27.26  | 45.29  | 28.93  | 26.27  | 37.11  | 0.7 | -0.5 | NA | 30S ribosomal protein S5                                                         | Translation, post-translational modification, degradation | Cytoplasmic         |
| PA14_50450 figE  | 462  | 0.0   | 19.0  | 7.0   | 42.0   | 0.00   | 17.62  | 7.64   | 17.65  | 8.81   | 12.64  | 0.7 | -0.5 | NA | flagellar hook protein FigE                                                      | Motility & Attachment                                     | Extracellular       |
| PA14_05530 mexA  | 383  | 0.0   | 7.0   | 0.0   | 22.5   | 0.00   | 2.81   | 0.00   | 4.10   | 1.41   | 2.05   | 0.7 | -0.5 | NA | RND multidrug efflux membrane fusion protein MexA precursor                      | Transport of small molecules                              | CytoplasmicMembrane |
| PA14_09270 pchE  | 1438 | 0.0   | 5.0   | 0.0   | 16.0   | 0.00   | 0.72   | 0.00   | 1.05   | 0.36   | 0.53   | 0.7 | -0.5 | NA | dihydroaeruginic acid synthetase                                                 | Transport of small molecules                              | Unknown             |
| PA14_51880 oprD  | 443  | 20.0  | 290.5 | 125.5 | 870.0  | 42.31  | 155.85 | 79.24  | 211.43 | 99.08  | 145.33 | 0.7 | -0.6 | Up | Basic amino acid, basic peptide and imipenem outer membrane porin OprD precursor | Transport of small molecules                              | OuterMembrane       |
| PA14_59250 pilN2 | 545  | 0.0   | 2.0   | 2.5   | 0.0    | 0.00   | 0.76   | 1.12   | 0.00   | 0.38   | 0.56   | 0.7 | -0.6 | NA | Type IV B pilus protein                                                          | Motility & Attachment                                     | OuterMembrane       |
| PA14_03800 oprE  | 463  | 33.5  | 123.0 | 159.5 | 429.0  | 39.52  | 36.79  | 56.15  | 58.13  | 38.15  | 57.14  | 0.7 | -0.6 | Up | anaerobically-induced outer membrane porin OprE precursor                        | Membrane proteins                                         | OuterMembrane       |

|                 |      |      |       |       |       |        |       |        |        |       |        |     |      |    |                                                      |                                                                 |                          |
|-----------------|------|------|-------|-------|-------|--------|-------|--------|--------|-------|--------|-----|------|----|------------------------------------------------------|-----------------------------------------------------------------|--------------------------|
| PA14_60460 rplU | 103  | 4.0  | 20.0  | 26.5  | 49.5  | 9.01   | 11.43 | 17.82  | 12.81  | 10.22 | 15.32  | 0.7 | -0.6 | NA | 50S ribosomal protein L21                            | Translation, post-translational modification, degradation       | Cytoplasmic              |
| PA14_17250      | 471  | 0.0  | 3.0   | 0.0   | 10.0  | 0.00   | 2.88  | 0.00   | 4.35   | 1.44  | 2.18   | 0.7 | -0.6 | NA | putative amino acid permease                         | Transport of small molecules                                    | CytoplasmicMembrane      |
| PA14_02020      | 444  | 50.0 | 115.5 | 240.0 | 439.0 | 87.33  | 51.16 | 125.10 | 88.08  | 69.24 | 106.59 | 0.7 | -0.6 | Up | putative outer membrane porin cytochrome c5          | Membrane proteins<br>Energy metabolism                          | OuterMembrane<br>Unknown |
| PA14_69970 cycB | 136  | 0.0  | 11.0  | 10.0  | 11.5  | 0.00   | 9.78  | 10.47  | 4.63   | 4.89  | 7.55   | 0.7 | -0.6 | NA | 5,10-methylenetetrahydrofolate reductase             | Central intermediary metabolism                                 | Cytoplasmic              |
| PA14_05590 metF | 290  | 0.0  | 2.0   | 0.0   | 7.0   | 0.00   | 1.03  | 0.00   | 1.64   | 0.52  | 0.82   | 0.6 | -0.7 | NA | ATP-dependent protease ATP-binding subunit HslU      | Chaperones & heat shock proteins                                | Cytoplasmic              |
| PA14_66790 hslU | 447  | 2.0  | 7.0   | 0.0   | 52.5  | 2.31   | 2.06  | 0.00   | 6.98   | 2.19  | 3.49   | 0.6 | -0.7 | Up | 50S ribosomal protein L4                             | Translation, post-translational modification, degradation       | Cytoplasmic              |
| PA14_08860 rplD | 200  | 19.0 | 21.0  | 99.0  | 95.0  | 35.36  | 9.91  | 54.99  | 20.31  | 22.64 | 37.65  | 0.6 | -0.7 | Up | 50S ribosomal protein L14                            | Translation, post-translational modification, degradation       | Cytoplasmic              |
| PA14_08950 rplN | 122  | 11.0 | 27.0  | 66.0  | 88.5  | 23.29  | 14.50 | 41.71  | 21.53  | 18.90 | 31.62  | 0.6 | -0.7 | Up | outer membrane OprD family porin                     | Membrane proteins                                               | OuterMembrane            |
| PA14_28400      | 425  | 70.0 | 56.0  | 402.0 | 190.5 | 96.81  | 19.64 | 165.93 | 30.27  | 58.23 | 98.10  | 0.6 | -0.8 | Up | hypothetical protein                                 | Membrane proteins                                               | CytoplasmicMembrane      |
| PA14_00550      | 469  | 0.0  | 1.0   | 0.0   | 4.0   | 0.00   | 0.60  | 0.00   | 1.08   | 0.30  | 0.54   | 0.6 | -0.9 | NA | UDP-N-acetylmuramoyl-L-alanyl-D-glutamate synthetase | Cell wall / LPS / capsule                                       | Cytoplasmic              |
| PA14_57370 murD | 448  | 0.0  | 0.5   | 0.0   | 2.0   | 0.00   | 0.18  | 0.00   | 0.32   | 0.09  | 0.16   | 0.6 | -0.9 | NA | hypothetical protein                                 | Hypothetical, unclassified, unknown                             | Unknown                  |
| PA14_57920      | 175  | 0.0  | 6.0   | 0.0   | 24.5  | 0.00   | 4.18  | 0.00   | 7.74   | 2.09  | 3.87   | 0.5 | -0.9 | NA | RNA-binding protein Hfq                              | Related to phage, transposon, or plasmid                        | Cytoplasmic              |
| PA14_65310 hfq  | 82   | 0.0  | 4.0   | 4.0   | 6.0   | 0.00   | 3.04  | 3.58   | 2.06   | 1.52  | 2.82   | 0.5 | -0.9 | NA | hypothetical protein                                 | Hypothetical, unclassified, unknown                             | Unknown                  |
| PA14_46900      | 152  | 8.0  | 2.0   | 48.5  | 15.0  | 30.95  | 1.96  | 56.00  | 6.67   | 16.46 | 31.33  | 0.5 | -0.9 | Up | putative cytochrome c1 precursor                     | Energy metabolism                                               | Unknown                  |
| PA14_57540      | 260  | 0.0  | 16.0  | 0.0   | 69.0  | 0.00   | 7.14  | 0.00   | 13.94  | 3.57  | 6.97   | 0.5 | -1.0 | NA | putative lytic enzyme                                | Putative enzymes                                                | Unknown                  |
| PA14_08160      | 209  | 0.0  | 6.0   | 1.0   | 25.0  | 0.00   | 3.03  | 0.59   | 5.72   | 1.52  | 3.16   | 0.5 | -1.1 | NA | hypothetical protein                                 | Hypothetical, unclassified, unknown                             | Cytoplasmic              |
| PA14_21220      | 151  | 4.0  | 7.0   | 34.0  | 18.5  | 10.23  | 4.54  | 25.96  | 5.44   | 7.39  | 15.70  | 0.5 | -1.1 | NA | hypothetical protein                                 | Hypothetical, unclassified, unknown                             | Unknown                  |
| PA14_06040      | 234  | 1.0  | 0.0   | 5.0   | 5.5   | 2.50   | 0.00  | 3.73   | 1.58   | 1.25  | 2.65   | 0.5 | -1.1 | NA | 30S ribosomal protein S16                            | Translation, post-translational modification, degradation       | Cytoplasmic              |
| PA14_15970 rpsP | 83   | 11.0 | 19.5  | 88.0  | 72.5  | 49.37  | 22.20 | 117.88 | 37.38  | 35.79 | 77.63  | 0.5 | -1.1 | Up | 30S ribosomal protein S3                             | Translation, post-translational modification, degradation       | Cytoplasmic              |
| PA14_08910 rpsC | 228  | 4.0  | 25.0  | 52.5  | 62.5  | 6.25   | 9.90  | 24.47  | 11.21  | 8.07  | 17.84  | 0.5 | -1.1 | NA | L-lactate dehydrogenase                              | Energy metabolism                                               | Cytoplasmic              |
| PA14_63090 lldD | 381  | 0.0  | 2.0   | 0.0   | 10.0  | 0.00   | 0.76  | 0.00   | 1.72   | 0.38  | 0.86   | 0.4 | -1.2 | NA | putative glutathione S-transferase                   | Central intermediary metabolism                                 | Cytoplasmic              |
| PA14_40070      | 207  | 0.0  | 1.0   | 0.0   | 5.0   | 0.00   | 0.75  | 0.00   | 1.70   | 0.37  | 0.85   | 0.4 | -1.2 | NA | hypothetical protein                                 | Energy metabolism                                               | Unknown                  |
| PA14_30800      | 200  | 0.0  | 1.0   | 0.0   | 5.0   | 0.00   | 0.73  | 0.00   | 1.66   | 0.37  | 0.83   | 0.4 | -1.2 | NA | hypothetical protein                                 | Hypothetical, unclassified, unknown                             | Unknown                  |
| PA14_33120      | 144  | 0.0  | 1.0   | 0.0   | 5.0   | 0.00   | 0.72  | 0.00   | 1.64   | 0.36  | 0.82   | 0.4 | -1.2 | NA | hypothetical protein                                 | Transport of small molecules                                    | CytoplasmicMembrane      |
| PA14_57110      | 278  | 0.0  | 1.0   | 0.0   | 5.0   | 0.00   | 0.65  | 0.00   | 1.47   | 0.32  | 0.73   | 0.4 | -1.2 | NA | hypothetical protein                                 | Membrane proteins                                               | CytoplasmicMembrane      |
| PA14_14500      | 372  | 0.0  | 1.0   | 0.0   | 5.0   | 0.00   | 0.64  | 0.00   | 1.45   | 0.32  | 0.72   | 0.4 | -1.2 | NA | hypothetical protein                                 | Hypothetical, unclassified, unknown                             | OuterMembrane            |
| PA14_50740      | 154  | 24.0 | 32.0  | 187.0 | 168.0 | 120.43 | 40.72 | 280.04 | 96.84  | 80.57 | 188.44 | 0.4 | -1.2 | Up | hypothetical protein                                 | Hypothetical, unclassified, unknown                             | Cytoplasmic              |
| PA14_50630      | 221  | 0.0  | 9.0   | 0.0   | 46.5  | 0.00   | 8.35  | 0.00   | 19.54  | 4.17  | 9.77   | 0.4 | -1.2 | NA | putative AcrB/AcrD/AcrF family protein               | Antibiotic resistance and susceptibility                        | CytoplasmicMembrane      |
| PA14_57060      | 335  | 19.0 | 17.0  | 118.0 | 179.0 | 29.75  | 6.75  | 55.15  | 32.20  | 18.25 | 43.68  | 0.4 | -1.3 | Up | hypothetical protein                                 | Hypothetical, unclassified, unknown ; Motility & Attachment     | CytoplasmicMembrane      |
| PA14_46590      | 1029 | 0.0  | 7.0   | 0.0   | 37.0  | 0.00   | 1.74  | 0.00   | 4.16   | 0.87  | 2.08   | 0.4 | -1.3 | NA | translocation protein TolB                           | Transport of small molecules                                    | Periplasmic              |
| PA14_65540      | 691  | 1.0  | 0.0   | 4.0   | 10.5  | 1.10   | 0.00  | 1.31   | 1.32   | 0.55  | 1.31   | 0.4 | -1.3 | NA | hypothetical protein                                 | Hypothetical, unclassified, unknown                             | Unknown                  |
| PA14_51720 tolB | 432  | 20.0 | 45.0  | 90.0  | 444.5 | 32.14  | 18.34 | 43.16  | 82.06  | 25.24 | 62.61  | 0.4 | -1.3 | Up | ApaG                                                 | Hypothetical, unclassified, unknown                             | Unknown                  |
| PA14_64030      | 356  | 0.0  | 5.0   | 8.0   | 6.5   | 0.00   | 2.46  | 4.64   | 1.45   | 1.23  | 3.04   | 0.4 | -1.3 | NA | hypothetical protein                                 | Translation, post-translational modification, degradation       | Unknown                  |
| PA14_07710 apaG | 126  | 0.0  | 1.0   | 0.0   | 5.5   | 0.00   | 2.78  | 0.00   | 6.92   | 1.39  | 3.46   | 0.4 | -1.3 | NA | hypothetical protein                                 | Transport of small molecules                                    | Cytoplasmic              |
| PA14_18650      | 108  | 0.0  | 5.0   | 0.0   | 28.0  | 0.00   | 9.23  | 0.00   | 23.41  | 4.62  | 11.71  | 0.4 | -1.3 | NA | putative outer membrane lipoprotein                  | Membrane proteins                                               | Unknown                  |
| PA14_07430      | 923  | 0.0  | 3.0   | 0.0   | 17.0  | 0.00   | 0.66  | 0.00   | 1.69   | 0.33  | 0.84   | 0.4 | -1.4 | NA | bacterioferritin                                     | Transport of small molecules                                    | Cytoplasmic              |
| PA14_09340 fptA | 720  | 39.0 | 83.0  | 310.5 | 546.0 | 30.33  | 16.37 | 72.08  | 48.78  | 23.35 | 60.43  | 0.4 | -1.4 | Up | Fe(III)-pyochelin outer membrane receptor precursor  | Translation, post-translational modification, degradation       | Cytoplasmic              |
| PA14_29270      | 367  | 0.0  | 12.0  | 18.0  | 23.0  | 0.00   | 4.71  | 8.31   | 4.09   | 2.35  | 6.20   | 0.4 | -1.4 | NA | 50S ribosomal protein L11                            | Translation, post-translational modification, degradation       | Cytoplasmic              |
| PA14_09160 bfrA | 154  | 12.0 | 1.0   | 97.5  | 30.5  | 97.62  | 2.06  | 236.73 | 28.50  | 49.84 | 132.62 | 0.4 | -1.4 | Up | Lipid A 3-O-deacylase                                | Hypothetical, unclassified, unknown ; Cell wall / LPS / capsule | Unknown                  |
| PA14_08720 rplK | 143  | 2.0  | 15.0  | 30.0  | 68.0  | 4.37   | 8.30  | 19.54  | 17.05  | 6.33  | 18.29  | 0.4 | -1.5 | Up | elongation factor Tu                                 | Translation, post-translational modification, degradation       | Cytoplasmic              |
| PA14_61650 pagL | 173  | 37.0 | 60.0  | 295.0 | 584.5 | 109.61 | 45.07 | 260.81 | 198.90 | 77.34 | 229.85 | 0.3 | -1.6 | Up | D-ala-D-ala-carboxypeptidase                         | Cell wall / LPS / capsule                                       | CytoplasmicMembrane      |
| PA14_08830 tufA | 397  | 0.0  | 21.0  | 34.0  | 54.0  | 0.00   | 3.78  | 7.21   | 4.41   | 1.89  | 5.81   | 0.3 | -1.6 | NA | 3-ketoacyl-(acyl-carrier-protein) reductase          | Fatty acid and phospholipid metabolism                          | Cytoplasmic              |
| PA14_12100 dacC | 386  | 0.0  | 3.5   | 8.0   | 3.5   | 0.00   | 1.72  | 4.62   | 0.78   | 0.86  | 2.70   | 0.3 | -1.7 | NA | aspartyl-tRNA synthetase                             | Transcription, RNA processing and degradation                   | Cytoplasmic              |
| PA14_25660 fabG | 247  | 0.0  | 15.0  | 16.0  | 66.0  | 0.00   | 10.78 | 13.53  | 21.48  | 5.39  | 17.51  | 0.3 | -1.7 | NA |                                                      |                                                                 |                          |
| PA14_51820 aspS | 591  | 5.0  | 8.5   | 48.0  | 83.5  | 4.51   | 1.94  | 12.92  | 8.65   | 3.23  | 10.78  | 0.3 | -1.7 | Up |                                                      |                                                                 |                          |

|                 |      |     |       |       |       |       |       |        |        |       |        |     |      |    |                                                                                             |                                                           |                     |
|-----------------|------|-----|-------|-------|-------|-------|-------|--------|--------|-------|--------|-----|------|----|---------------------------------------------------------------------------------------------|-----------------------------------------------------------|---------------------|
| PA14_17270 accA | 316  | 0.0 | 2.0   | 0.0   | 15.0  | 0.00  | 1.12  | 0.00   | 3.81   | 0.56  | 1.90   | 0.3 | -1.8 | NA | acetyl-CoA carboxylase carboxyltransferase subunit alpha                                    | Fatty acid and phospholipid metabolism                    | CytoplasmicMembrane |
| PA14_30110 purB | 456  | 0.0 | 1.0   | 3.0   | 0.0   | 0.00  | 0.37  | 1.31   | 0.00   | 0.19  | 0.66   | 0.3 | -1.8 | NA | adenylosuccinate lyase                                                                      | Nucleotide biosynthesis and metabolism                    | Cytoplasmic         |
| PA14_19050 metG | 678  | 0.0 | 1.0   | 0.0   | 8.0   | 0.00  | 0.21  | 0.00   | 0.75   | 0.10  | 0.37   | 0.3 | -1.9 | NA | methionyl-tRNA synthetase                                                                   | Translation, post-translational modification, degradation | Cytoplasmic         |
| PA14_39070      | 130  | 9.0 | 18.0  | 75.0  | 239.5 | 45.16 | 22.91 | 112.32 | 138.05 | 34.03 | 125.18 | 0.3 | -1.9 | Up | hypothetical protein                                                                        | Hypothetical, unclassified, unknown                       | Unknown             |
| PA14_65180 rpsF | 139  | 0.0 | 3.0   | 4.0   | 14.0  | 0.00  | 1.73  | 2.72   | 3.66   | 0.87  | 3.19   | 0.3 | -1.9 | NA | 30S ribosomal protein S6                                                                    | Translation, post-translational modification, degradation | Cytoplasmic         |
| PA14_67510 estA | 646  | 4.0 | 34.0  | 76.5  | 213.5 | 6.36  | 13.72 | 36.32  | 39.02  | 10.04 | 37.67  | 0.3 | -1.9 | Up | esterase EstA                                                                               | Fatty acid and phospholipid metabolism                    | OuterMembrane       |
| PA14_51380 pqsE | 301  | 0.0 | 1.5   | 0.0   | 12.5  | 0.00  | 0.75  | 0.00   | 2.82   | 0.37  | 1.41   | 0.3 | -1.9 | NA | Quinolone signal response protein                                                           |                                                           | Cytoplasmic         |
| PA14_16630      | 261  | 2.0 | 102.0 | 118.0 | 617.5 | 5.05  | 65.34 | 88.96  | 179.19 | 35.20 | 134.07 | 0.3 | -1.9 | Up | putative outer membrane protein, OmpA                                                       | Membrane proteins                                         | OuterMembrane       |
| PA14_73250 atpG | 286  | 0.0 | 3.0   | 5.5   | 13.0  | 0.00  | 1.35  | 2.91   | 2.64   | 0.67  | 2.78   | 0.2 | -2.0 | NA | F0F1 ATP synthase subunit gamma                                                             | Energy metabolism                                         | Cytoplasmic         |
| PA14_61290      | 273  | 0.0 | 8.0   | 5.0   | 60.0  | 0.00  | 6.13  | 4.51   | 20.84  | 3.07  | 12.67  | 0.2 | -2.1 | NA | putative lipoprotein                                                                        | Fatty acid and phospholipid metabolism                    | Unknown             |
| PA14_19470 mqoA | 523  | 0.0 | 1.0   | 2.0   | 4.0   | 0.00  | 0.54  | 1.28   | 0.98   | 0.27  | 1.13   | 0.2 | -2.1 | NA | malate:quinone oxidoreductase                                                               | Central intermediary metabolism                           | Unknown             |
| PA14_15310 guaB | 489  | 0.0 | 7.0   | 8.5   | 43.0  | 0.00  | 2.54  | 3.62   | 7.06   | 1.27  | 5.34   | 0.2 | -2.1 | NA | inosine 5'-monophosphate dehydrogenase                                                      | Nucleotide biosynthesis and metabolism                    | Cytoplasmic         |
| PA14_24290 glt  | 654  | 0.0 | 7.0   | 2.0   | 63.5  | 0.00  | 3.11  | 1.05   | 12.79  | 1.56  | 6.92   | 0.2 | -2.2 | Up | glycine betaine transmethylase                                                              | Amino acid biosynthesis and metabolism                    | OuterMembrane       |
| PA14_61780      | 204  | 0.0 | 5.0   | 11.0  | 23.0  | 0.00  | 1.72  | 4.44   | 3.57   | 0.86  | 4.01   | 0.2 | -2.2 | NA | 50S ribosomal protein L25/general stress protein Ctc                                        | Translation, post-translational modification, degradation | Cytoplasmic         |
| PA14_53500      | 237  | 0.0 | 30.0  | 66.0  | 152.0 | 0.00  | 24.22 | 62.72  | 55.59  | 12.11 | 59.16  | 0.2 | -2.3 | Up | hypothetical protein                                                                        | Hypothetical, unclassified, unknown                       | OuterMembrane       |
| PA14_05550 oprM | 485  | 2.0 | 15.0  | 43.0  | 147.5 | 3.09  | 5.87  | 19.80  | 26.15  | 4.48  | 22.97  | 0.2 | -2.4 | Up | major intrinsic multiple antibiotic resistance efflux outer membrane protein OprM precursor | Membrane proteins                                         | OuterMembrane       |
| PA14_00910      | 1102 | 1.0 | 0.0   | 7.0   | 27.0  | 0.58  | 0.00  | 1.21   | 1.79   | 0.29  | 1.50   | 0.2 | -2.4 | NA | hypothetical protein                                                                        | Hypothetical, unclassified, unknown                       | CytoplasmicMembrane |
| PA14_08680 tufB | 397  | 0.0 | 21.0  | 44.0  | 128.0 | 0.00  | 3.78  | 9.33   | 10.45  | 1.89  | 9.89   | 0.2 | -2.4 | Up | elongation factor Tu                                                                        | Translation, post-translational modification, degradation | Cytoplasmic         |
| PA14_33070      | 666  | 0.0 | 5.0   | 0.0   | 61.0  | 0.00  | 1.61  | 0.00   | 8.88   | 0.80  | 4.44   | 0.2 | -2.5 | Up | hypothetical protein                                                                        | Hypothetical, unclassified, unknown                       | CytoplasmicMembrane |
| PA14_62990 grpE | 186  | 0.0 | 1.0   | 1.0   | 10.0  | 0.00  | 1.05  | 1.24   | 4.78   | 0.53  | 3.01   | 0.2 | -2.5 | NA | heat shock protein GrpE                                                                     | Chaperones & heat shock proteins                          | Cytoplasmic         |
| PA14_50340 flgL | 439  | 0.0 | 3.0   | 12.0  | 6.5   | 0.00  | 0.84  | 3.95   | 0.82   | 0.42  | 2.38   | 0.2 | -2.5 | NA | flagellar hook-associated protein FlgL                                                      | Motility & Attachment                                     | Extracellular       |
| PA14_57480      | 604  | 8.0 | 6.0   | 109.0 | 235.5 | 11.87 | 2.26  | 48.25  | 40.12  | 7.06  | 44.19  | 0.2 | -2.7 | Up | putative lipoprotein                                                                        | Fatty acid and phospholipid metabolism                    | CytoplasmicMembrane |
| PA14_23030 oprB | 454  | 0.0 | 29.5  | 77.5  | 207.0 | 0.00  | 13.77 | 42.58  | 43.78  | 6.89  | 43.18  | 0.2 | -2.7 | Up | glucose/carbohydrate outer membrane porin OprB precursor                                    | Transport of small molecules                              | OuterMembrane       |
| PA14_15070 oprC | 723  | 7.0 | 11.0  | 135.5 | 189.0 | 5.39  | 2.15  | 31.11  | 16.70  | 3.77  | 23.91  | 0.2 | -2.7 | Up | outer membrane copper receptor OprC                                                         | Transport of small molecules                              | OuterMembrane       |
| PA14_54520      | 427  | 0.0 | 1.0   | 0.0   | 14.0  | 0.00  | 0.39  | 0.00   | 2.48   | 0.20  | 1.24   | 0.2 | -2.7 | NA | porin                                                                                       | Membrane proteins                                         | OuterMembrane       |
| PA14_30230 cipA | 758  | 0.0 | 0.5   | 0.0   | 7.0   | 0.00  | 0.13  | 0.00   | 0.80   | 0.06  | 0.40   | 0.2 | -2.7 | NA | ATP-dependent ctp protease, ATP-binding subunit CtpA                                        | Translation, post-translational modification, degradation | Cytoplasmic         |
| PA14_34960      | 452  | 0.0 | 24.5  | 64.5  | 179.0 | 0.00  | 11.54 | 35.77  | 38.20  | 5.77  | 36.98  | 0.2 | -2.7 | Up | glucose-sensitive porin                                                                     | Transport of small molecules                              | OuterMembrane       |
| PA14_16640      | 134  | 0.0 | 24.5  | 0.0   | 353.0 | 0.00  | 76.81 | 0.00   | 501.29 | 38.40 | 250.65 | 0.2 | -2.7 | Up | putative lipoprotein                                                                        | Fatty acid and phospholipid metabolism                    | Unknown             |
| PA14_33680 fpvA | 815  | 0.0 | 1.0   | 2.0   | 9.5   | 0.00  | 0.23  | 0.54   | 0.99   | 0.11  | 0.76   | 0.2 | -2.7 | NA | ferripyoverdine receptor                                                                    | Transport of small molecules                              | OuterMembrane       |
| PA14_00820      | 304  | 0.0 | 27.0  | 32.0  | 325.0 | 0.00  | 14.31 | 19.96  | 78.01  | 7.15  | 48.98  | 0.2 | -2.8 | Up | hypothetical protein                                                                        | Hypothetical, unclassified, unknown                       | CytoplasmicMembrane |
| PA14_41690      | 179  | 1.0 | 0.0   | 15.0  | 23.0  | 3.01  | 0.00  | 13.46  | 7.94   | 1.50  | 10.70  | 0.1 | -2.8 | NA | hypothetical protein                                                                        | Hypothetical, unclassified, unknown                       | Unknown             |
| PA14_60230 comL | 341  | 0.0 | 3.0   | 5.0   | 35.0  | 0.00  | 1.21  | 2.37   | 6.38   | 0.60  | 4.38   | 0.1 | -2.9 | NA | competence protein ComL                                                                     | Cell wall / LPS / capsule                                 | OuterMembrane       |
| PA14_63030 omlA | 176  | 0.0 | 4.0   | 21.0  | 11.0  | 0.00  | 7.04  | 43.48  | 8.77   | 3.52  | 26.12  | 0.1 | -2.9 | NA | outer membrane lipoprotein OmlA precursor                                                   | Cell wall / LPS / capsule                                 | OuterMembrane       |
| PA14_14470 pepA | 495  | 0.0 | 4.0   | 21.0  | 11.0  | 0.00  | 1.05  | 6.47   | 1.30   | 0.52  | 3.89   | 0.1 | -2.9 | NA | leucyl aminopeptidase                                                                       | Translation, post-translational modification, degradation | Cytoplasmic         |
| PA14_23380 orfH | 422  | 0.0 | 1.0   | 0.0   | 16.5  | 0.00  | 0.38  | 0.00   | 2.81   | 0.19  | 1.40   | 0.1 | -2.9 | NA | UDP-N-acetyl-D-mannosaminuronate dehydrogenase                                              | Cell wall / LPS / capsule                                 | Cytoplasmic         |
| PA14_64480 osmE | 114  | 0.0 | 23.0  | 122.0 | 70.0  | 0.00  | 29.33 | 183.12 | 40.44  | 14.67 | 111.78 | 0.1 | -2.9 | Up | DNA-binding transcriptional activator OsmE                                                  | Membrane proteins                                         | Unknown             |
| PA14_16250 lasB | 498  | 0.0 | 7.0   | 4.0   | 115.0 | 0.00  | 2.67  | 1.80   | 19.87  | 1.33  | 10.83  | 0.1 | -3.0 | Up | elastase LasB                                                                               | Amino acid biosynthesis and metabolism                    | Extracellular       |
| PA14_25560 rne  | 1057 | 0.0 | 3.0   | 17.0  | 10.0  | 0.00  | 0.52  | 3.49   | 0.79   | 0.26  | 2.14   | 0.1 | -3.0 | NA | ribonuclease E                                                                              | Transcription, RNA processing and degradation             | Cytoplasmic         |
| PA14_08850 rplC | 211  | 0.0 | 6.0   | 33.0  | 24.0  | 0.00  | 3.53  | 22.87  | 6.40   | 1.77  | 14.64  | 0.1 | -3.1 | NA | 50S ribosomal protein L3                                                                    | Translation, post-translational modification, degradation | Cytoplasmic         |
| PA14_43850 htpG | 634  | 0.0 | 30.0  | 144.5 | 176.0 | 0.00  | 3.74  | 21.20  | 9.94   | 1.87  | 15.57  | 0.1 | -3.1 | Up | heat shock protein 90                                                                       | Chaperones & heat shock proteins                          | Cytoplasmic         |

|                 |      |     |      |       |       |      |       |        |       |      |        |     |      |    |                                                                          |                                                           |                     |
|-----------------|------|-----|------|-------|-------|------|-------|--------|-------|------|--------|-----|------|----|--------------------------------------------------------------------------|-----------------------------------------------------------|---------------------|
| PA14_08760 rpoB | 1357 | 0.0 | 16.0 | 59.0  | 150.5 | 0.00 | 1.30  | 5.64   | 5.54  | 0.65 | 5.59   | 0.1 | -3.1 | Up | DNA-directed RNA polymerase subunit beta                                 | Translation, post-translational modification, degradation | Cytoplasmic         |
| PA14_46520      | 379  | 0.0 | 2.0  | 0.0   | 39.0  | 0.00 | 0.67  | 0.00   | 5.91  | 0.33 | 2.95   | 0.1 | -3.1 | Up | hypothetical protein                                                     | Hypothetical, unclassified, unknown                       | Periplasmic         |
| PA14_51240 purC | 236  | 0.0 | 9.0  | 55.0  | 36.5  | 0.00 | 4.53  | 32.55  | 8.31  | 2.26 | 20.43  | 0.1 | -3.2 | Up | phosphoribosylaminoimidazole-succinocarboxamide synthase                 | Nucleotide biosynthesis and metabolism                    | Cytoplasmic         |
| PA14_70040 dadA | 432  | 0.0 | 8.0  | 48.0  | 44.5  | 0.00 | 4.07  | 28.71  | 10.25 | 2.03 | 19.48  | 0.1 | -3.3 | Up | D-amino acid dehydrogenase small subunit                                 | Amino acid biosynthesis and metabolism                    | CytoplasmicMembrane |
| PA14_25250      | 461  | 0.0 | 7.0  | 37.0  | 56.0  | 0.00 | 2.01  | 12.49  | 7.28  | 1.00 | 9.89   | 0.1 | -3.3 | Up | glyceraldehyde-3-phosphate dehydrogenase                                 | Carbon compound catabolism                                | Cytoplasmic         |
| PA14_58570      | 753  | 0.0 | 7.0  | 40.5  | 48.0  | 0.00 | 1.43  | 9.70   | 4.43  | 0.71 | 7.06   | 0.1 | -3.3 | Up | putative outer membrane ferric siderophore receptor                      | Transport of small molecules                              | OuterMembrane       |
| PA14_08840 rpsJ | 103  | 0.0 | 6.5  | 41.0  | 44.0  | 0.00 | 3.19  | 23.71  | 9.79  | 1.60 | 16.75  | 0.1 | -3.4 | Up | 30S ribosomal protein S10                                                | Translation, post-translational modification, degradation | Cytoplasmic         |
| PA14_26550      | 119  | 0.0 | 4.0  | 18.0  | 46.5  | 0.00 | 4.91  | 26.01  | 25.86 | 2.46 | 25.94  | 0.1 | -3.4 | Up | putative lipoprotein                                                     | Fatty acid and phospholipid metabolism                    | Unknown             |
| PA14_25390 sth  | 464  | 0.0 | 1.0  | 0.0   | 24.0  | 0.00 | 0.35  | 0.00   | 3.85  | 0.18 | 1.93   | 0.1 | -3.4 | Up | soluble pyridine nucleotide transhydrogenase                             | Nucleotide biosynthesis and metabolism                    | Cytoplasmic         |
| PA14_05510      | 191  | 0.0 | 12.0 | 10.0  | 273.0 | 0.00 | 5.52  | 5.41   | 56.88 | 2.76 | 31.15  | 0.1 | -3.5 | Up | hypothetical protein                                                     | Membrane proteins                                         | Unknown             |
| PA14_41230 clpX | 426  | 0.0 | 1.0  | 6.5   | 8.0   | 0.00 | 0.33  | 2.54   | 1.20  | 0.17 | 1.87   | 0.1 | -3.5 | NA | ATP-dependent protease ATP-binding subunit ClpX                          | Chaperones & heat shock proteins                          | Cytoplasmic         |
| PA14_24445 gdhB | 1620 | 0.0 | 3.0  | 22.0  | 25.5  | 0.00 | 0.29  | 2.50   | 1.11  | 0.14 | 1.81   | 0.1 | -3.6 | Up | NAD-dependent glutamate dehydrogenase                                    | Amino acid biosynthesis and metabolism                    | Cytoplasmic         |
| PA14_25860 lefB | 249  | 0.0 | 2.0  | 0.0   | 55.5  | 0.00 | 1.21  | 0.00   | 15.19 | 0.60 | 7.59   | 0.1 | -3.7 | Up | electron transfer flavoprotein beta-subunit                              | Energy metabolism                                         | Unknown             |
| PA14_20750      | 310  | 0.0 | 1.0  | 8.0   | 7.0   | 0.00 | 0.51  | 4.81   | 1.62  | 0.26 | 3.22   | 0.1 | -3.7 | NA | putative chemotaxis protein                                              | Chemotaxis                                                | Cytoplasmic         |
| PA14_65720      | 248  | 0.0 | 2.5  | 19.0  | 21.0  | 0.00 | 1.73  | 15.51  | 6.60  | 0.87 | 11.05  | 0.1 | -3.7 | Up | putative lipoprotein                                                     | Fatty acid and phospholipid metabolism                    | Cytoplasmic         |
| PA14_08780 rpoC | 1399 | 0.0 | 7.0  | 38.0  | 101.5 | 0.00 | 0.55  | 3.53   | 3.63  | 0.28 | 3.58   | 0.1 | -3.7 | Up | DNA-directed RNA polymerase subunit beta'                                | Transcription, RNA processing and degradation             | Cytoplasmic         |
| PA14_62710 pnp  | 701  | 0.0 | 1.0  | 8.5   | 8.0   | 0.00 | 0.17  | 1.65   | 0.60  | 0.08 | 1.12   | 0.1 | -3.8 | NA | polynucleotide phosphorylase/polyadenylase                               | Transcription, RNA processing and degradation             | Cytoplasmic         |
| PA14_69240 hemB | 337  | 0.0 | 3.0  | 28.0  | 19.5  | 0.00 | 2.59  | 28.41  | 7.61  | 1.29 | 18.01  | 0.1 | -3.8 | Up | delta-aminolevulinic acid dehydratase                                    | Biosynthesis of cofactors, prosthetic groups and carriers | Cytoplasmic         |
| PA14_66900 ubiE | 256  | 0.0 | 1.0  | 9.0   | 8.0   | 0.00 | 0.59  | 6.23   | 2.13  | 0.29 | 4.18   | 0.1 | -3.8 | NA | ubiquinone/menaquinone biosynthesis methyltransferase                    | Biosynthesis of cofactors, prosthetic groups and carriers | Cytoplasmic         |
| PA14_62000 hltA | 335  | 0.0 | 2.0  | 12.0  | 37.0  | 0.00 | 1.30  | 9.21   | 10.94 | 0.65 | 10.08  | 0.1 | -4.0 | Up | ferric iron-binding periplasmic protein HltA                             | Transport of small molecules                              | Periplasmic         |
| PA14_47800      | 616  | 0.0 | 5.0  | 45.0  | 55.5  | 0.00 | 1.45  | 15.30  | 7.26  | 0.72 | 11.28  | 0.1 | -4.0 | Up | putative tonB-dependent receptor                                         | Transport of small molecules                              | OuterMembrane       |
| PA14_70490      | 243  | 0.0 | 4.0  | 18.0  | 98.0  | 0.00 | 2.35  | 12.42  | 26.03 | 1.17 | 19.23  | 0.1 | -4.0 | Up | putative lipoprotein                                                     | Fatty acid and phospholipid metabolism                    | Unknown             |
| PA14_67600 glnA | 469  | 0.0 | 5.0  | 43.0  | 69.5  | 0.00 | 1.59  | 16.05  | 9.99  | 0.79 | 13.02  | 0.1 | -4.0 | Up | glutamine synthetase                                                     | Amino acid biosynthesis and metabolism                    | Cytoplasmic         |
| PA14_54170 putA | 1060 | 0.0 | 6.5  | 45.5  | 120.0 | 0.00 | 0.64  | 5.28   | 5.36  | 0.32 | 5.32   | 0.1 | -4.1 | Up | bifunctional proline dehydrogenase/pyrroline-5-carboxylate dehydrogenase | Amino acid biosynthesis and metabolism                    | Cytoplasmic         |
| PA14_07770 ostA | 924  | 0.0 | 21.0 | 194.5 | 277.0 | 0.00 | 3.97  | 43.23  | 23.70 | 1.98 | 33.47  | 0.1 | -4.1 | Up | organic solvent tolerance protein OstA precursor                         | Adaptation, Protection                                    | OuterMembrane       |
| PA14_05560      | 639  | 0.0 | 2.0  | 20.0  | 27.5  | 0.00 | 0.46  | 5.35   | 2.83  | 0.23 | 4.09   | 0.1 | -4.2 | Up | ATP-dependent RNA helicase                                               | Transcription, RNA processing and degradation             | Cytoplasmic         |
| PA14_67490 fbp  | 336  | 0.0 | 1.0  | 10.5  | 14.0  | 0.00 | 0.80  | 9.85   | 5.05  | 0.40 | 7.45   | 0.1 | -4.2 | NA | fructose-1,6-bisphosphatase                                              | Central intermediary metabolism                           | Cytoplasmic         |
| PA14_47120      | 170  | 0.0 | 11.0 | 140.5 | 100.0 | 0.00 | 13.51 | 203.04 | 55.62 | 6.75 | 129.33 | 0.1 | -4.3 | Up | hypothetical protein                                                     | Hypothetical, unclassified, unknown                       | Unknown             |
| PA14_21730      | 721  | 0.0 | 6.0  | 67.0  | 82.0  | 0.00 | 1.71  | 22.41  | 10.56 | 0.85 | 16.49  | 0.1 | -4.3 | Up | putative TonB-dependent receptor                                         | Transport of small molecules                              | OuterMembrane       |
| PA14_62690      | 114  | 0.0 | 5.0  | 39.0  | 114.0 | 0.00 | 5.09  | 46.74  | 52.59 | 2.55 | 49.67  | 0.1 | -4.3 | Up | hypothetical protein                                                     | Hypothetical, unclassified, unknown                       | Periplasmic         |
| PA14_17070 tsf  | 289  | 0.0 | 5.0  | 34.5  | 129.0 | 0.00 | 1.01  | 8.19   | 11.78 | 0.50 | 9.98   | 0.1 | -4.3 | Up | elongation factor Ts                                                     | Translation, post-translational modification, degradation | Cytoplasmic         |
| PA14_60580      | 618  | 0.0 | 1.0  | 8.0   | 24.5  | 0.00 | 0.30  | 2.81   | 3.31  | 0.15 | 3.06   | 0.1 | -4.4 | Up | hypothetical protein                                                     | Hypothetical, unclassified, unknown                       | Unknown             |
| PA14_21790 rdgC | 306  | 0.0 | 1.0  | 11.0  | 17.0  | 0.00 | 0.35  | 4.51   | 2.69  | 0.17 | 3.60   | 0.1 | -4.4 | NA | recombination associated protein                                         | DNA replication, recombination, modification and repair   | Cytoplasmic         |
| PA14_29990 nuoD | 593  | 0.0 | 1.0  | 13.0  | 13.0  | 0.00 | 0.31  | 4.74   | 1.82  | 0.15 | 3.28   | 0.1 | -4.4 | NA | bifunctional NADH:ubiquinone oxidoreductase subunit C/D                  | Energy metabolism                                         | Cytoplasmic         |
| PA14_09200 ssb  | 165  | 0.0 | 1.0  | 11.0  | 18.5  | 0.00 | 1.20  | 15.49  | 10.03 | 0.60 | 12.76  | 0.1 | -4.4 | NA | single-stranded DNA-binding protein                                      | DNA replication, recombination, modification and repair   | Cytoplasmic         |
| PA14_68330 arcA | 418  | 0.0 | 2.0  | 20.5  | 44.5  | 0.00 | 0.67  | 8.14   | 6.80  | 0.34 | 7.47   | 0.1 | -4.5 | Up | arginine deiminase                                                       | Amino acid biosynthesis and metabolism                    | Cytoplasmic         |
| PA14_44010 sucA | 943  | 0.0 | 0.5  | 1.0   | 25.0  | 0.00 | 0.11  | 0.26   | 2.48  | 0.06 | 1.37   | 0.0 | -4.6 | NA | 2-oxoglutarate dehydrogenase E1 component                                | Energy metabolism                                         | Cytoplasmic         |
| PA14_56590      | 286  | 0.0 | 1.0  | 14.0  | 27.0  | 0.00 | 0.45  | 7.47   | 5.54  | 0.23 | 6.51   | 0.0 | -4.8 | Up | hypothetical protein                                                     | Adaptation, Protection                                    | Cytoplasmic         |
| PA14_52020      | 345  | 0.0 | 1.0  | 8.0   | 43.0  | 0.00 | 0.77  | 7.26   | 15.01 | 0.39 | 11.14  | 0.0 | -4.9 | Up | hypothetical protein                                                     | Hypothetical, unclassified, unknown                       | Periplasmic         |
| PA14_14730 iscS | 404  | 0.0 | 1.0  | 1.0   | 62.0  | 0.00 | 0.42  | 0.50   | 11.95 | 0.21 | 6.22   | 0.0 | -4.9 | Up | cysteine desulfurase                                                     | Amino acid biosynthesis and metabolism                    | Cytoplasmic         |
| PA14_53250 cpbD | 389  | 0.0 | 4.0  | 67.0  | 89.0  | 0.00 | 2.17  | 42.88  | 21.92 | 1.09 | 32.40  | 0.0 | -4.9 | Up | chitin-binding protein CbpD precursor                                    | Secreted Factors (toxins, enzymes, alginate)              | Extracellular       |
| PA14_41220 lon  | 798  | 0.0 | 1.0  | 18.0  | 24.5  | 0.00 | 0.16  | 3.36   | 1.76  | 0.08 | 2.56   | 0.0 | -5.0 | Up | Lon protease                                                             | Translation, post-translational modification, degradation | Cytoplasmic         |



|                 |      |     |     |       |       |      |      |        |       |      |        |     |       |    |                                                                         |                                                              |                     |
|-----------------|------|-----|-----|-------|-------|------|------|--------|-------|------|--------|-----|-------|----|-------------------------------------------------------------------------|--------------------------------------------------------------|---------------------|
| PA14_41470 acnB | 869  | 0.0 | 2.0 | 33.0  | 59.0  | 0.00 | 0.25 | 4.93   | 3.39  | 0.13 | 4.16   | 0.0 | -5.0  | Up | bifunctional aconitate hydratase<br>2/2-methylisocitrate<br>dehydratase | Energy metabolism                                            | Cytoplasmic         |
| PA14_36310 hcnC | 417  | 0.0 | 1.0 | 21.0  | 20.0  | 0.00 | 0.49 | 12.09  | 4.43  | 0.24 | 8.26   | 0.0 | -5.1  | Up | hydrogen cyanide synthase<br>HcnC                                       | Central intermediary metabolism                              | Cytoplasmic         |
| PA14_53200      | 182  | 0.0 | 1.0 | 14.0  | 42.0  | 0.00 | 0.80 | 13.15  | 15.19 | 0.40 | 14.17  | 0.0 | -5.2  | Up | hypothetical protein                                                    | Hypothetical, unclassified, unknown                          | Unknown             |
| PA14_14850 pilF | 252  | 1.0 | 7.5 | 310.5 | 169.5 | 2.03 | 3.87 | 188.47 | 39.60 | 2.95 | 114.04 | 0.0 | -5.3  | Up | type 4 fimbrial biogenesis<br>protein PilF                              | Motility & Attachment                                        | Unknown             |
| PA14_32790      | 5212 | 1.0 | 6.0 | 185.0 | 409.0 | 0.12 | 0.18 | 6.58   | 5.59  | 0.15 | 6.08   | 0.0 | -5.3  | Up | hypothetical protein                                                    | Hypothetical, unclassified, unknown                          | OuterMembrane       |
| PA14_72400      | 259  | 0.0 | 1.0 | 33.0  | 8.0   | 0.00 | 0.58 | 22.38  | 2.09  | 0.29 | 12.23  | 0.0 | -5.4  | Up | putative N-acetylmuramoyl-L-<br>alanine amidase family protein          | Putative enzymes                                             | Cytoplasmic         |
| PA14_14910      | 380  | 0.0 | 3.0 | 74.5  | 93.0  | 0.00 | 1.84 | 53.71  | 25.81 | 0.92 | 39.76  | 0.0 | -5.4  | Up | hypothetical protein                                                    | Hypothetical, unclassified, unknown                          | OuterMembrane       |
| PA14_72600      | 262  | 0.0 | 1.0 | 31.5  | 18.0  | 0.00 | 0.77 | 28.46  | 6.26  | 0.38 | 17.36  | 0.0 | -5.5  | Up | putative lipoprotein                                                    | Fatty acid and phospholipid metabolism                       | Unknown             |
| PA14_62840 gimM | 445  | 0.0 | 2.0 | 18.0  | 164.0 | 0.00 | 1.06 | 11.19  | 39.25 | 0.53 | 25.22  | 0.0 | -5.6  | Up | phosphoglucosamine mutase                                               | Cell wall / LPS / capsule                                    | Cytoplasmic         |
| PA14_00570      | 228  | 0.0 | 1.0 | 22.5  | 52.5  | 0.00 | 0.77 | 20.38  | 18.31 | 0.39 | 19.34  | 0.0 | -5.7  | Up | putative lipoprotein                                                    | Cell wall / LPS / capsule                                    | Unknown             |
| PA14_65590      | 236  | 0.0 | 1.0 | 25.5  | 46.5  | 0.00 | 0.78 | 23.45  | 16.46 | 0.39 | 19.96  | 0.0 | -5.7  | Up | hypothetical protein                                                    | Hypothetical, unclassified, unknown                          | Unknown             |
| PA14_52600 alaS | 874  | 0.0 | 0.5 | 7.0   | 38.5  | 0.00 | 0.09 | 1.55   | 3.28  | 0.05 | 2.41   | 0.0 | -5.7  | NA | alanyl-tRNA synthetase                                                  | Transcription, RNA processing and<br>degradation             | Cytoplasmic         |
| PA14_44290 acnA | 910  | 0.0 | 1.0 | 18.5  | 70.0  | 0.00 | 0.23 | 5.07   | 7.39  | 0.12 | 6.23   | 0.0 | -5.7  | Up | aconitate hydratase                                                     | Energy metabolism                                            | Cytoplasmic         |
| PA14_25080 fadB | 715  | 0.0 | 1.0 | 53.0  | 36.5  | 0.00 | 0.22 | 13.46  | 3.57  | 0.11 | 8.52   | 0.0 | -6.3  | Up | multifunctional fatty acid<br>oxidation complex subunit alpha           | Fatty acid and phospholipid metabolism                       | Cytoplasmic         |
| PA14_12210      | 207  | 0.0 | 2.0 | 112.0 | 68.5  | 0.00 | 1.32 | 86.82  | 20.44 | 0.66 | 53.63  | 0.0 | -6.4  | Up | hypothetical protein                                                    | Hypothetical, unclassified, unknown                          | Unknown             |
| PA14_17150      | 794  | 0.0 | 1.0 | 37.0  | 96.5  | 0.00 | 0.30 | 13.24  | 13.29 | 0.15 | 13.26  | 0.0 | -6.5  | Up | putative outer membrane<br>antigen                                      | Cell wall / LPS / capsule                                    | OuterMembrane       |
| PA14_67810      | 436  | 0.0 | 1.0 | 64.0  | 95.0  | 0.00 | 0.39 | 29.01  | 16.57 | 0.19 | 22.79  | 0.0 | -6.9  | Up | putative carboxyl-terminal<br>protease                                  | Related to phage, transposon, or<br>plasmid                  | CytoplasmicMembrane |
| PA14_58410      | 484  | 0.0 | 1.0 | 35.0  | 265.5 | 0.00 | 0.47 | 19.17  | 55.96 | 0.23 | 37.56  | 0.0 | -7.3  | Up | putative porin                                                          | Transport of small molecules                                 | OuterMembrane       |
| PA14_00510      | 3443 | 0.0 | 1.0 | 66.5  | 195.0 | 0.00 | 0.04 | 3.42   | 3.86  | 0.02 | 3.64   | 0.0 | -7.4  | Up | putative hemagglutinin                                                  | Membrane proteins                                            | OuterMembrane       |
| PA14_07200      | 66   | 0.0 | 0.0 | 25.0  | 27.0  | 0.00 | 0.00 | 111.56 | 46.37 | 0.00 | 78.97  | 0.0 | -10.0 | NA | hypothetical protein                                                    | Hypothetical, unclassified, unknown                          | Unknown             |
| PA14_52960      | 88   | 0.0 | 0.0 | 18.0  | 29.0  | 0.00 | 0.00 | 61.91  | 38.39 | 0.00 | 50.15  | 0.0 | -10.0 | NA | hypothetical protein                                                    | Hypothetical, unclassified, unknown                          | Unknown             |
| PA14_20600      | 224  | 0.0 | 0.0 | 22.0  | 119.0 | 0.00 | 0.00 | 30.14  | 62.76 | 0.00 | 46.45  | 0.0 | -10.0 | Up | hypothetical protein                                                    | Hypothetical, unclassified, unknown                          | CytoplasmicMembrane |
| PA14_11370      | 156  | 0.0 | 0.0 | 48.0  | 43.5  | 0.00 | 0.00 | 58.81  | 20.52 | 0.00 | 39.66  | 0.0 | -10.0 | Up | putative lipoprotein                                                    | Fatty acid and phospholipid metabolism                       | Unknown             |
| PA14_72450 dsbA | 211  | 0.0 | 0.0 | 67.0  | 37.0  | 0.00 | 0.00 | 60.70  | 12.90 | 0.00 | 36.80  | 0.0 | -10.0 | Up | thiol:disulfide interchange<br>protein DsbA                             | Biosynthesis of cofactors, prosthetic<br>groups and carriers | Periplasmic         |
| PA14_09150 katA | 482  | 0.0 | 0.0 | 81.0  | 86.0  | 0.00 | 0.00 | 41.18  | 16.83 | 0.00 | 29.00  | 0.0 | -10.0 | Up | catalase                                                                | Adaptation, Protection                                       | Cytoplasmic         |
| PA14_07760 surA | 430  | 0.0 | 0.0 | 84.0  | 129.0 | 0.00 | 0.00 | 35.74  | 21.13 | 0.00 | 28.44  | 0.0 | -10.0 | Up | peptidyl-prolyl cis-trans<br>isomerase SurA                             | Adaptation, Protection                                       | Periplasmic         |
| PA14_22010 minE | 84   | 0.0 | 0.0 | 17.0  | 9.0   | 0.00 | 0.00 | 43.52  | 8.87  | 0.00 | 26.19  | 0.0 | -10.0 | NA | cell division topological<br>specificity factor MinE                    | Cell division                                                | Cytoplasmic         |
| PA14_33310      | 342  | 0.0 | 0.0 | 60.0  | 66.5  | 0.00 | 0.00 | 35.28  | 15.05 | 0.00 | 25.17  | 0.0 | -10.0 | Up | hypothetical protein                                                    | Hypothetical, unclassified, unknown                          | Unknown             |
| PA14_06010      | 192  | 0.0 | 0.0 | 21.5  | 31.0  | 0.00 | 0.00 | 31.34  | 17.39 | 0.00 | 24.37  | 0.0 | -10.0 | NA | hypothetical protein                                                    | Hypothetical, unclassified, unknown                          | Unknown             |
| PA14_72500      | 96   | 0.0 | 0.0 | 11.0  | 47.5  | 0.00 | 0.00 | 17.59  | 29.24 | 0.00 | 23.41  | 0.0 | -10.0 | NA | hypothetical protein                                                    | Hypothetical, unclassified, unknown                          | Unknown             |
| PA14_57840      | 215  | 0.0 | 0.0 | 36.0  | 44.0  | 0.00 | 0.00 | 31.83  | 14.97 | 0.00 | 23.40  | 0.0 | -10.0 | NA | hypothetical protein                                                    | Adaptation, Protection                                       | Unknown             |
| PA14_00490      | 562  | 0.0 | 0.0 | 96.0  | 119.5 | 0.00 | 0.00 | 31.06  | 14.88 | 0.00 | 22.97  | 0.0 | -10.0 | Up | putative hemolysin<br>activation/secretion protein                      | Protein secretion/export apparatus                           | OuterMembrane       |
| PA14_28450 eco  | 156  | 0.0 | 0.0 | 41.0  | 20.0  | 0.00 | 0.00 | 38.24  | 7.18  | 0.00 | 22.71  | 0.0 | -10.0 | NA | ecotin                                                                  | Translation, post-translational<br>modification, degradation | Periplasmic         |
| PA14_63220      | 81   | 0.0 | 0.0 | 16.0  | 23.0  | 0.00 | 0.00 | 28.79  | 15.93 | 0.00 | 22.36  | 0.0 | -10.0 | NA | hypothetical protein                                                    | Hypothetical, unclassified, unknown                          | Unknown             |
| PA14_16840      | 132  | 0.0 | 0.0 | 6.0   | 38.0  | 0.00 | 0.00 | 12.70  | 30.96 | 0.00 | 21.83  | 0.0 | -10.0 | NA | putative lipoprotein                                                    | Fatty acid and phospholipid metabolism                       | Unknown             |
| PA14_65750      | 482  | 0.0 | 0.0 | 83.0  | 139.5 | 0.00 | 0.00 | 26.11  | 16.89 | 0.00 | 21.50  | 0.0 | -10.0 | Up | putative outer membrane efflux<br>protein precursor                     | Protein secretion/export apparatus                           | OuterMembrane       |
| PA14_62430      | 158  | 0.0 | 0.0 | 23.0  | 11.0  | 0.00 | 0.00 | 36.25  | 6.67  | 0.00 | 21.46  | 0.0 | -10.0 | NA | hypothetical protein                                                    | Hypothetical, unclassified, unknown                          | Unknown             |
| PA14_03610      | 252  | 0.0 | 0.0 | 38.0  | 27.0  | 0.00 | 0.00 | 33.28  | 9.10  | 0.00 | 21.19  | 0.0 | -10.0 | NA | putative putative Zn-dependent<br>protease with chaperone<br>function   | Chaperones & heat shock proteins                             | Unknown             |
| PA14_03920 spuD | 367  | 0.0 | 0.0 | 42.0  | 48.0  | 0.00 | 0.00 | 28.48  | 12.53 | 0.00 | 20.50  | 0.0 | -10.0 | Up | polyamine transport protein                                             | Transport of small molecules                                 | Periplasmic         |
| PA14_58300      | 186  | 0.0 | 0.0 | 9.0   | 12.0  | 0.00 | 0.00 | 26.77  | 13.74 | 0.00 | 20.26  | 0.0 | -10.0 | NA | putative two-component<br>response regulator                            | Two-component regulatory systems                             | Cytoplasmic         |
| PA14_67720 secB | 163  | 0.0 | 0.0 | 28.5  | 7.5   | 0.00 | 0.00 | 34.86  | 3.53  | 0.00 | 19.19  | 0.0 | -10.0 | NA | preprotein translocase subunit<br>SecB                                  | Protein secretion/export apparatus                           | Cytoplasmic         |
| PA14_30310 lolA | 208  | 0.0 | 0.0 | 26.0  | 53.0  | 0.00 | 0.00 | 20.97  | 16.45 | 0.00 | 18.71  | 0.0 | -10.0 | NA | outer-membrane lipoprotein<br>carrier protein                           | Chaperones & heat shock proteins                             | Periplasmic         |
| PA14_32780      | 565  | 0.0 | 0.0 | 85.0  | 75.0  | 0.00 | 0.00 | 26.68  | 9.06  | 0.00 | 17.87  | 0.0 | -10.0 | Up | hypothetical protein                                                    | Hypothetical, unclassified, unknown                          | OuterMembrane       |
| PA14_49660      | 282  | 0.0 | 0.0 | 9.0   | 46.5  | 0.00 | 0.00 | 11.94  | 23.73 | 0.00 | 17.84  | 0.0 | -10.0 | NA | hypothetical protein                                                    | Hypothetical, unclassified, unknown                          | Periplasmic         |
| PA14_62580 panB | 266  | 0.0 | 0.0 | 19.0  | 6.0   | 0.00 | 0.00 | 31.14  | 3.79  | 0.00 | 17.46  | 0.0 | -10.0 | NA | 3-methyl-2-oxobutanoate<br>hydroxymethyltransferase                     | Biosynthesis of cofactors, prosthetic<br>groups and carriers | Unknown             |
| PA14_38510 hmgA | 432  | 0.0 | 0.0 | 29.0  | 48.0  | 0.00 | 0.00 | 21.00  | 13.38 | 0.00 | 17.19  | 0.0 | -10.0 | NA | homogentisate 1,2-dioxygenase                                           | Carbon compound catabolism                                   | Unknown             |
| PA14_04090      | 256  | 0.0 | 0.0 | 34.0  | 69.5  | 0.00 | 0.00 | 19.19  | 15.10 | 0.00 | 17.15  | 0.0 | -10.0 | Up | putative binding protein<br>component of ABC transporter                | Transport of small molecules                                 | Periplasmic         |

|                  |     |     |     |      |       |      |      |       |       |      |       |     |       |    |                                                       |                                                           |                      |
|------------------|-----|-----|-----|------|-------|------|------|-------|-------|------|-------|-----|-------|----|-------------------------------------------------------|-----------------------------------------------------------|----------------------|
| PA14_09420 phzF1 | 278 | 0.0 | 0.0 | 20.0 | 33.0  | 0.00 | 0.00 | 20.57 | 13.07 | 0.00 | 16.82 | 0.0 | -10.0 | NA | phenazine biosynthesis protein                        | Secreted Factors (toxins, enzymes, alginate)              | Cytoplasmic          |
| PA14_47550       | 184 | 0.0 | 0.0 | 34.0 | 15.0  | 0.00 | 0.00 | 28.71 | 4.88  | 0.00 | 16.79 | 0.0 | -10.0 | NA | putative glutathione peroxidase                       | Adaptation, Protection                                    | Periplasmic          |
| PA14_54390 mucD  | 474 | 0.0 | 0.0 | 30.5 | 63.0  | 0.00 | 0.00 | 18.46 | 14.68 | 0.00 | 16.57 | 0.0 | -10.0 | Up | serine protease MucD precursor                        | Secreted Factors (toxins, enzymes, alginate)              | Periplasmic          |
| PA14_04100       | 145 | 0.0 | 0.0 | 8.0  | 51.0  | 0.00 | 0.00 | 8.59  | 21.08 | 0.00 | 14.84 | 0.0 | -10.0 | NA | hypothetical protein                                  | Hypothetical, unclassified, unknown                       | Unknown              |
| PA14_65000 azu   | 148 | 0.0 | 0.0 | 15.0 | 14.0  | 0.00 | 0.00 | 21.40 | 7.69  | 0.00 | 14.54 | 0.0 | -10.0 | NA | azurin precursor                                      | Energy metabolism                                         | Periplasmic          |
| PA14_43950 sucC  | 388 | 0.0 | 0.0 | 41.0 | 208.0 | 0.00 | 0.00 | 9.76  | 19.06 | 0.00 | 14.41 | 0.0 | -10.0 | Up | succinyl-CoA synthetase subunit beta                  | Energy metabolism                                         | Cytoplasmic          |
| PA14_62130 ilvC  | 338 | 0.0 | 0.0 | 31.0 | 57.0  | 0.00 | 0.00 | 16.51 | 11.69 | 0.00 | 14.10 | 0.0 | -10.0 | Up | ketol-acid reductoisomerase                           | Amino acid biosynthesis and metabolism                    | Cytoplasmic          |
| PA14_21130       | 242 | 0.0 | 0.0 | 33.5 | 10.0  | 0.00 | 0.00 | 24.05 | 2.76  | 0.00 | 13.41 | 0.0 | -10.0 | NA | putative outer membrane lipoprotein                   | Membrane proteins                                         | Unknown              |
| PA14_46960 ggt   | 557 | 0.0 | 0.0 | 58.0 | 33.5  | 0.00 | 0.00 | 21.27 | 4.73  | 0.00 | 13.00 | 0.0 | -10.0 | Up | gamma-glutamyltranspeptidase precursor                | Central intermediary metabolism                           | Periplasmic          |
| PA14_51830       | 156 | 0.0 | 0.0 | 9.0  | 47.0  | 0.00 | 0.00 | 8.64  | 17.36 | 0.00 | 13.00 | 0.0 | -10.0 | NA | DNA-binding stress protein                            | Adaptation, Protection                                    | Cytoplasmic          |
| PA14_38350 galU  | 279 | 0.0 | 0.0 | 6.5  | 71.0  | 0.00 | 0.00 | 4.99  | 20.96 | 0.00 | 12.97 | 0.0 | -10.0 | NA | UTP-glucose-1-phosphate uridylyltransferase           | Central intermediary metabolism                           | Cytoplasmic          |
| PA14_52790 aotJ  | 259 | 0.0 | 0.0 | 27.0 | 80.0  | 0.00 | 0.00 | 12.06 | 13.76 | 0.00 | 12.91 | 0.0 | -10.0 | Up | arginine/ornithine binding protein AotJ               | Transport of small molecules                              | Periplasmic          |
| PA14_51410 pgsC  | 348 | 0.0 | 0.0 | 10.5 | 40.5  | 0.00 | 0.00 | 10.29 | 15.27 | 0.00 | 12.78 | 0.0 | -10.0 | NA | PgsC                                                  | Energy metabolism                                         | Cytoplasmic          |
| PA14_40830       | 330 | 0.0 | 0.0 | 19.0 | 53.0  | 0.00 | 0.00 | 12.27 | 13.17 | 0.00 | 12.72 | 0.0 | -10.0 | NA | putative oxidoreductase                               | Energy metabolism                                         | Cytoplasmic          |
| PA14_67620       | 134 | 0.0 | 0.0 | 1.0  | 39.0  | 0.00 | 0.00 | 1.58  | 23.77 | 0.00 | 12.68 | 0.0 | -10.0 | NA | hypothetical protein                                  | Hypothetical, unclassified, unknown                       | Unknown              |
| PA14_43940 sucD  | 295 | 0.0 | 0.0 | 46.0 | 46.5  | 0.00 | 0.00 | 17.78 | 6.92  | 0.00 | 12.35 | 0.0 | -10.0 | Up | succinyl-CoA synthetase subunit alpha                 | Energy metabolism                                         | Cytoplasmic          |
| PA14_21175       | 335 | 0.0 | 0.0 | 48.0 | 55.5  | 0.00 | 0.00 | 16.86 | 7.50  | 0.00 | 12.18 | 0.0 | -10.0 | Up | hypothetical protein                                  | Transport of small molecules                              | Periplasmic          |
| PA14_47010       | 68  | 0.0 | 0.0 | 8.0  | 6.5   | 0.00 | 0.00 | 18.54 | 5.80  | 0.00 | 12.17 | 0.0 | -10.0 | NA | hypothetical protein                                  | Hypothetical, unclassified, unknown                       | Unknown              |
| PA14_48800       | 205 | 0.0 | 0.0 | 25.0 | 0.5   | 0.00 | 0.00 | 24.00 | 0.18  | 0.00 | 12.09 | 0.0 | -10.0 | Up | hypothetical protein                                  | Fatty acid and phospholipid metabolism                    | Cytoplasmic          |
| PA14_39890 phzF2 | 278 | 0.0 | 0.0 | 20.0 | 9.0   | 0.00 | 0.00 | 20.57 | 3.56  | 0.00 | 12.07 | 0.0 | -10.0 | NA | phenazine biosynthesis protein                        | Secreted Factors (toxins, enzymes, alginate)              | Cytoplasmic          |
| PA14_09500 opmD  | 487 | 0.0 | 0.0 | 47.0 | 56.0  | 0.00 | 0.00 | 15.56 | 7.13  | 0.00 | 11.35 | 0.0 | -10.0 | Up | outer membrane protein                                | Membrane proteins                                         | Outer/Membrane       |
| PA14_12160       | 448 | 0.0 | 0.0 | 37.0 | 43.0  | 0.00 | 0.00 | 15.64 | 7.00  | 0.00 | 11.32 | 0.0 | -10.0 | NA | putative murein transglycosylase                      | Putative enzymes                                          | Cytoplasmic/Membrane |
| PA14_18630       | 995 | 0.0 | 0.0 | 30.0 | 175.0 | 0.00 | 0.00 | 6.96  | 15.62 | 0.00 | 11.29 | 0.0 | -10.0 | Up | putative serine protease                              | Putative enzymes                                          | Outer/Membrane       |
| PA14_58330       | 236 | 0.0 | 0.0 | 13.0 | 34.0  | 0.00 | 0.00 | 11.19 | 11.27 | 0.00 | 11.23 | 0.0 | -10.0 | NA | hypothetical protein                                  | Hypothetical, unclassified, unknown                       | Unknown              |
| PA14_66880       | 138 | 0.0 | 0.0 | 19.5 | 35.0  | 0.00 | 0.00 | 13.17 | 9.10  | 0.00 | 11.13 | 0.0 | -10.0 | NA | hypothetical protein                                  | Transcriptional regulators                                | Unknown              |
| PA14_14660       | 182 | 0.0 | 0.0 | 18.0 | 14.0  | 0.00 | 0.00 | 16.93 | 5.07  | 0.00 | 11.00 | 0.0 | -10.0 | NA | hypothetical protein                                  | Protein secretion/export apparatus                        | Outer/Membrane       |
| PA14_38440 gnyD  | 387 | 0.0 | 0.0 | 27.0 | 18.0  | 0.00 | 0.00 | 16.93 | 4.34  | 0.00 | 10.64 | 0.0 | -10.0 | NA | Citronellol-CoA dehydrogenase, GnyD                   | Fatty acid and phospholipid metabolism                    | Cytoplasmic          |
| PA14_46910       | 302 | 0.0 | 0.0 | 6.0  | 84.0  | 0.00 | 0.00 | 3.21  | 17.29 | 0.00 | 10.25 | 0.0 | -10.0 | Up | putative binding protein component of ABC transporter | Transport of small molecules                              | Periplasmic          |
| PA14_09450 phzD1 | 207 | 0.0 | 0.0 | 4.0  | 19.0  | 0.00 | 0.00 | 6.99  | 12.78 | 0.00 | 9.88  | 0.0 | -10.0 | NA | phenazine biosynthesis protein PhzD                   | Secreted Factors (toxins, enzymes, alginate)              | Cytoplasmic          |
| PA14_45580       | 368 | 0.0 | 0.0 | 21.0 | 13.0  | 0.00 | 0.00 | 15.60 | 3.72  | 0.00 | 9.66  | 0.0 | -10.0 | NA | chemotaxis-specific methyltransferase                 | Chemotaxis                                                | Cytoplasmic          |
| PA14_17400 adhC  | 370 | 0.0 | 0.0 | 17.0 | 12.0  | 0.00 | 0.00 | 14.66 | 3.98  | 0.00 | 9.32  | 0.0 | -10.0 | NA | alcohol dehydrogenase class III                       | Central intermediary metabolism                           | Cytoplasmic          |
| PA14_03930 spuE  | 365 | 0.0 | 0.0 | 26.0 | 6.5   | 0.00 | 0.00 | 16.98 | 1.63  | 0.00 | 9.31  | 0.0 | -10.0 | NA | polyamine transport protein                           | Transport of small molecules                              | Periplasmic          |
| PA14_60700 ccpR  | 346 | 0.0 | 0.0 | 19.0 | 4.0   | 0.00 | 0.00 | 16.98 | 1.38  | 0.00 | 9.18  | 0.0 | -10.0 | NA | cytochrome c551 peroxidase precursor                  | Energy metabolism                                         | Periplasmic          |
| PA14_01020       | 498 | 0.0 | 0.0 | 22.0 | 34.0  | 0.00 | 0.00 | 11.49 | 6.84  | 0.00 | 9.17  | 0.0 | -10.0 | NA | hypothetical protein                                  | Hypothetical, unclassified, unknown                       | Cytoplasmic          |
| PA14_50520 braC  | 373 | 0.0 | 0.0 | 23.0 | 55.5  | 0.00 | 0.00 | 9.34  | 8.68  | 0.00 | 9.01  | 0.0 | -10.0 | NA | branched-chain amino acid transport protein BraC      | Transport of small molecules                              | Periplasmic          |
| PA14_56160       | 335 | 0.0 | 0.0 | 22.0 | 16.0  | 0.00 | 0.00 | 14.02 | 3.93  | 0.00 | 8.97  | 0.0 | -10.0 | NA | hypothetical protein                                  | Putative enzymes                                          | Cytoplasmic          |
| PA14_66250 waaF  | 345 | 0.0 | 0.0 | 11.0 | 44.5  | 0.00 | 0.00 | 6.97  | 10.86 | 0.00 | 8.91  | 0.0 | -10.0 | NA | heptosyltransferase II                                | Cell wall / LPS / capsule                                 | Cytoplasmic          |
| PA14_05620 sahH  | 469 | 0.0 | 0.0 | 23.0 | 29.5  | 0.00 | 0.00 | 11.57 | 5.71  | 0.00 | 8.64  | 0.0 | -10.0 | NA | S-adenosyl-L-homocysteine hydrolase                   | Central intermediary metabolism                           | Cytoplasmic          |
| PA14_60470 jipB  | 322 | 0.0 | 0.0 | 19.0 | 20.0  | 0.00 | 0.00 | 12.15 | 4.92  | 0.00 | 8.53  | 0.0 | -10.0 | NA | octaprenyl-diphosphate synthase                       | Biosynthesis of cofactors, prosthetic groups and carriers | Cytoplasmic          |
| PA14_32610 dsbG  | 256 | 0.0 | 0.0 | 11.0 | 9.0   | 0.00 | 0.00 | 12.81 | 4.04  | 0.00 | 8.42  | 0.0 | -10.0 | NA | disulfide isomerase/thiol-disulfide oxidase           | Translation, post-translational modification, degradation | Periplasmic          |
| PA14_16950 dapD  | 344 | 0.0 | 0.0 | 16.0 | 31.0  | 0.00 | 0.00 | 9.05  | 6.75  | 0.00 | 7.90  | 0.0 | -10.0 | NA | tetrahydrodipicolinate succinylase                    | Amino acid biosynthesis and metabolism                    | Unknown              |
| PA14_58390       | 533 | 0.0 | 0.0 | 10.0 | 51.0  | 0.00 | 0.00 | 5.33  | 10.47 | 0.00 | 7.90  | 0.0 | -10.0 | NA | putative binding protein component of ABC transporter | Transport of small molecules                              | Periplasmic          |
| PA14_49460 nrdA  | 963 | 0.0 | 0.0 | 37.0 | 108.5 | 0.00 | 0.00 | 7.39  | 8.34  | 0.00 | 7.86  | 0.0 | -10.0 | Up | ribonucleotide-diphosphate reductase subunit alpha    | Nucleotide biosynthesis and metabolism                    | Cytoplasmic          |
| PA14_44780       | 259 | 0.0 | 0.0 | 13.0 | 24.0  | 0.00 | 0.00 | 9.16  | 6.51  | 0.00 | 7.84  | 0.0 | -10.0 | NA | putative transcriptional regulator                    | Transcriptional regulators                                | Cytoplasmic          |
| PA14_05250 pyrC  | 423 | 0.0 | 0.0 | 19.0 | 2.0   | 0.00 | 0.00 | 14.68 | 0.59  | 0.00 | 7.64  | 0.0 | -10.0 | NA | dihydroorotase                                        | Nucleotide biosynthesis and metabolism                    | Unknown              |
| PA14_07680       | 640 | 0.0 | 0.0 | 22.0 | 94.5  | 0.00 | 0.00 | 5.68  | 9.39  | 0.00 | 7.53  | 0.0 | -10.0 | Up | hypothetical protein                                  | Two-component regulatory systems                          | Cytoplasmic          |

|                  |     |     |     |      |      |      |      |       |       |      |      |     |       |    |                                                               |                                                           |                     |
|------------------|-----|-----|-----|------|------|------|------|-------|-------|------|------|-----|-------|----|---------------------------------------------------------------|-----------------------------------------------------------|---------------------|
| PA14_57260 pxc   | 303 | 0.0 | 0.0 | 18.0 | 20.0 | 0.00 | 0.00 | 10.50 | 4.49  | 0.00 | 7.50 | 0.0 | -10.0 | NA | UDP-3-O-[3-hydroxymristoyl] N-acetylglucosamine deacetylase   | Cell wall / LPS / capsule                                 | Cytoplasmic         |
| PA14_36320 hcnB  | 464 | 0.0 | 0.0 | 15.0 | 34.0 | 0.00 | 0.00 | 7.92  | 6.91  | 0.00 | 7.41 | 0.0 | -10.0 | NA | hydrogen cyanide synthase HcnB                                | Central intermediary metabolism                           | Cytoplasmic         |
| PA14_14880 ispG  | 371 | 0.0 | 0.0 | 23.0 | 23.5 | 0.00 | 0.00 | 10.51 | 4.13  | 0.00 | 7.32 | 0.0 | -10.0 | NA | 4-hydroxy-3-methylbut-2-en-1-yl diphosphate synthase          | Fatty acid and phospholipid metabolism                    | Cytoplasmic         |
| PA14_59610       | 224 | 0.0 | 0.0 | 16.5 | 8.0  | 0.00 | 0.00 | 12.26 | 2.29  | 0.00 | 7.27 | 0.0 | -10.0 | NA | hypothetical protein                                          | Hypothetical, unclassified, unknown                       | Unknown             |
| PA14_14390       | 325 | 0.0 | 0.0 | 9.0  | 43.0 | 0.00 | 0.00 | 4.99  | 9.17  | 0.00 | 7.08 | 0.0 | -10.0 | NA | putative ABC-type transport protein, periplasmic c            | Transport of small molecules                              | Unknown             |
| PA14_71440 ltaA  | 346 | 0.0 | 0.0 | 4.0  | 41.5 | 0.00 | 0.00 | 2.81  | 11.22 | 0.00 | 7.02 | 0.0 | -10.0 | NA | low specificity L-threonine aldolase                          | Amino acid biosynthesis and metabolism                    | Unknown             |
| PA14_68260       | 331 | 0.0 | 0.0 | 20.0 | 16.0 | 0.00 | 0.00 | 10.63 | 3.27  | 0.00 | 6.96 | 0.0 | -10.0 | NA | c4-dicarboxylate-binding protein                              | Membrane proteins                                         | Periplasmic         |
| PA14_43530       | 220 | 0.0 | 0.0 | 7.0  | 7.0  | 0.00 | 0.00 | 9.86  | 3.79  | 0.00 | 6.83 | 0.0 | -10.0 | NA | hypothetical protein                                          | Central intermediary metabolism                           | Cytoplasmic         |
| PA14_07040       | 139 | 0.0 | 0.0 | 4.0  | 16.0 | 0.00 | 0.00 | 5.36  | 8.25  | 0.00 | 6.80 | 0.0 | -10.0 | NA | hypothetical protein                                          | Protein secretion/export apparatus                        | Unknown             |
| PA14_07260       | 255 | 0.0 | 0.0 | 9.0  | 25.0 | 0.00 | 0.00 | 6.57  | 7.02  | 0.00 | 6.79 | 0.0 | -10.0 | NA | hypothetical protein                                          | Hypothetical, unclassified, unknown                       | Cytoplasmic         |
| PA14_66230 waaG  | 373 | 0.0 | 0.0 | 11.0 | 13.0 | 0.00 | 0.00 | 9.16  | 4.17  | 0.00 | 6.66 | 0.0 | -10.0 | NA | UDP-glucose:(heptosyl) LPS alpha 1,3-glucosyltransferase WaaG | Cell wall / LPS / capsule                                 | Cytoplasmic         |
| PA14_21880 lsp   | 698 | 0.0 | 0.0 | 17.0 | 56.0 | 0.00 | 0.00 | 5.86  | 7.43  | 0.00 | 6.64 | 0.0 | -10.0 | NA | periplasmic tail-specific protease                            | Translation, post-translational modification, degradation | CytoplasmicMembrane |
| PA14_68340 arcB  | 336 | 0.0 | 0.0 | 12.0 | 16.0 | 0.00 | 0.00 | 8.55  | 4.39  | 0.00 | 6.47 | 0.0 | -10.0 | NA | ornithine carbamoyltransferase                                | Amino acid biosynthesis and metabolism                    | Cytoplasmic         |
| PA14_53230       | 207 | 0.0 | 0.0 | 9.5  | 18.0 | 0.00 | 0.00 | 7.39  | 5.39  | 0.00 | 6.39 | 0.0 | -10.0 | NA | oxidoreductase                                                | Putative enzymes                                          | Cytoplasmic         |
| PA14_04290       | 647 | 0.0 | 0.0 | 10.5 | 50.0 | 0.00 | 0.00 | 4.46  | 8.18  | 0.00 | 6.32 | 0.0 | -10.0 | NA | hypothetical protein                                          | Membrane proteins                                         | OuterMembrane       |
| PA14_52800 lacsA | 651 | 0.0 | 0.0 | 14.0 | 42.0 | 0.00 | 0.00 | 5.85  | 6.76  | 0.00 | 6.30 | 0.0 | -10.0 | NA | acetyl-CoA synthetase                                         | Central intermediary metabolism                           | Cytoplasmic         |
| PA14_04110 serA  | 409 | 0.0 | 0.0 | 7.5  | 57.5 | 0.00 | 0.00 | 3.18  | 9.38  | 0.00 | 6.28 | 0.0 | -10.0 | NA | D-3-phosphoglycerate dehydrogenase                            | Amino acid biosynthesis and metabolism                    | Cytoplasmic         |
| PA14_23370 orfK  | 378 | 0.0 | 0.0 | 14.0 | 26.0 | 0.00 | 0.00 | 7.30  | 5.22  | 0.00 | 6.26 | 0.0 | -10.0 | NA | putative UDP-N-acetylglucosamine 2-epimerase                  | Cell wall / LPS / capsule                                 | Cytoplasmic         |
| PA14_16830       | 226 | 0.0 | 0.0 | 13.5 | 7.0  | 0.00 | 0.00 | 9.87  | 1.97  | 0.00 | 5.92 | 0.0 | -10.0 | NA | hypothetical protein                                          | Hypothetical, unclassified, unknown                       | Unknown             |
| PA14_66580       | 551 | 0.0 | 0.0 | 5.0  | 32.0 | 0.00 | 0.00 | 3.40  | 8.38  | 0.00 | 5.89 | 0.0 | -10.0 | NA | hypothetical protein                                          | Protein secretion/export apparatus                        | CytoplasmicMembrane |
| PA14_61720       | 590 | 0.0 | 0.0 | 18.0 | 34.0 | 0.00 | 0.00 | 6.78  | 4.93  | 0.00 | 5.85 | 0.0 | -10.0 | NA | hypothetical protein                                          | Hypothetical, unclassified, unknown                       | Unknown             |
| PA14_63250       | 425 | 0.0 | 0.0 | 22.0 | 4.0  | 0.00 | 0.00 | 10.88 | 0.76  | 0.00 | 5.82 | 0.0 | -10.0 | NA | acetyl-CoA acetyltransferase                                  | Fatty acid and phospholipid metabolism                    | Cytoplasmic         |
| PA14_69470 algR  | 248 | 0.0 | 0.0 | 8.0  | 14.0 | 0.00 | 0.00 | 6.92  | 4.66  | 0.00 | 5.79 | 0.0 | -10.0 | NA | alginate biosynthesis regulatory protein AlgR                 | Two-component regulatory systems                          | Cytoplasmic         |
| PA14_24990       | 128 | 0.0 | 0.0 | 2.0  | 24.5 | 0.00 | 0.00 | 1.97  | 9.29  | 0.00 | 5.63 | 0.0 | -10.0 | NA | hypothetical protein                                          | Hypothetical, unclassified, unknown                       | Unknown             |
| PA14_13430 fecA  | 784 | 0.0 | 0.0 | 19.0 | 57.0 | 0.00 | 0.00 | 5.16  | 5.96  | 0.00 | 5.56 | 0.0 | -10.0 | NA | Fe(III) dicitrate transport protein FecA                      | Transport of small molecules                              | OuterMembrane       |
| PA14_09900 prpL  | 462 | 0.0 | 0.0 | 5.0  | 35.0 | 0.00 | 0.00 | 2.86  | 7.70  | 0.00 | 5.28 | 0.0 | -10.0 | NA | Pvds-regulated endoprotease, lysyl class                      | Putative enzymes                                          | Extracellular       |
| PA14_67050       | 266 | 0.0 | 0.0 | 11.0 | 9.0  | 0.00 | 0.00 | 7.97  | 2.51  | 0.00 | 5.24 | 0.0 | -10.0 | NA | putative binding protein component of ABC transporter         | Transport of small molecules                              | Periplasmic         |
| PA14_72540       | 734 | 0.0 | 0.0 | 14.0 | 58.0 | 0.00 | 0.00 | 3.90  | 6.22  | 0.00 | 5.06 | 0.0 | -10.0 | NA | putative ribonucleotide reductase                             | Nucleotide biosynthesis and metabolism                    | Cytoplasmic         |
| PA14_14040 rhl   | 507 | 0.0 | 0.0 | 14.0 | 10.0 | 0.00 | 0.00 | 7.90  | 2.17  | 0.00 | 5.04 | 0.0 | -10.0 | NA | ATP-dependent RNA helicase RhlB                               | Transcription, RNA processing and degradation             | Cytoplasmic         |
| PA14_72550       | 307 | 0.0 | 0.0 | 5.0  | 4.5  | 0.00 | 0.00 | 7.45  | 2.58  | 0.00 | 5.02 | 0.0 | -10.0 | NA | putative adhesin                                              | Transport of small molecules                              | Periplasmic         |
| PA14_15340 guaA  | 525 | 0.0 | 0.0 | 16.0 | 46.0 | 0.00 | 0.00 | 4.74  | 5.25  | 0.00 | 5.00 | 0.0 | -10.0 | NA | GMP synthase                                                  | Nucleotide biosynthesis and metabolism                    | Cytoplasmic         |
| PA14_27560       | 296 | 0.0 | 0.0 | 9.0  | 22.0 | 0.00 | 0.00 | 5.12  | 4.82  | 0.00 | 4.97 | 0.0 | -10.0 | NA | hypothetical protein                                          | Putative enzymes                                          | Cytoplasmic         |
| PA14_22980       | 420 | 0.0 | 0.0 | 9.0  | 35.5 | 0.00 | 0.00 | 3.89  | 5.90  | 0.00 | 4.89 | 0.0 | -10.0 | NA | putative binding protein component of ABC sugar transporter   | Transport of small molecules                              | Periplasmic         |
| PA14_61740 lolB  | 205 | 0.0 | 0.0 | 1.0  | 40.0 | 0.00 | 0.00 | 0.59  | 9.14  | 0.00 | 4.87 | 0.0 | -10.0 | NA | outer membrane lipoprotein LolB                               | Cell wall / LPS / capsule                                 | Unknown             |
| PA14_65660 parE  | 629 | 0.0 | 0.0 | 19.0 | 32.5 | 0.00 | 0.00 | 5.85  | 3.85  | 0.00 | 4.85 | 0.0 | -10.0 | NA | DNA topoisomerase IV subunit B                                | DNA replication, recombination, modification and repair   | Cytoplasmic         |
| PA14_17940 glpR  | 251 | 0.0 | 0.0 | 12.0 | 3.0  | 0.00 | 0.00 | 8.81  | 0.85  | 0.00 | 4.83 | 0.0 | -10.0 | NA | glycerol-3-phosphate regulon repressor                        | Transcriptional regulators                                | Cytoplasmic         |
| PA14_25840       | 551 | 0.0 | 0.0 | 17.5 | 35.0 | 0.00 | 0.00 | 5.41  | 4.16  | 0.00 | 4.79 | 0.0 | -10.0 | NA | electron transfer flavoprotein-ubiquinone oxidoreductase      | Energy metabolism                                         | Cytoplasmic         |
| PA14_27960 tal   | 307 | 0.0 | 0.0 | 1.5  | 47.0 | 0.00 | 0.00 | 0.73  | 8.79  | 0.00 | 4.76 | 0.0 | -10.0 | NA | transaldolase B                                               | Energy metabolism                                         | Cytoplasmic         |
| PA14_51910       | 318 | 0.0 | 0.0 | 6.0  | 14.0 | 0.00 | 0.00 | 4.82  | 4.32  | 0.00 | 4.57 | 0.0 | -10.0 | NA | hypothetical protein                                          | Hypothetical, unclassified, unknown                       | Unknown             |
| PA14_17930 glpD  | 512 | 0.0 | 0.0 | 18.0 | 16.0 | 0.00 | 0.00 | 6.79  | 2.32  | 0.00 | 4.55 | 0.0 | -10.0 | NA | glycerol-3-phosphate dehydrogenase                            | Energy metabolism                                         | Cytoplasmic         |
| PA14_35500 bkdB  | 428 | 0.0 | 0.0 | 10.0 | 17.0 | 0.00 | 0.00 | 5.46  | 3.57  | 0.00 | 4.51 | 0.0 | -10.0 | NA | branched-chain alpha-keto acid dehydrogenase subunit E2       | Amino acid biosynthesis and metabolism                    | Cytoplasmic         |
| PA14_13140       | 455 | 0.0 | 0.0 | 10.0 | 29.0 | 0.00 | 0.00 | 4.24  | 4.74  | 0.00 | 4.49 | 0.0 | -10.0 | NA | hypothetical protein                                          | Hypothetical, unclassified, unknown                       | Unknown             |

|                  |     |     |     |      |      |      |      |      |      |      |      |     |       |    |                                                            |                                                           |                     |
|------------------|-----|-----|-----|------|------|------|------|------|------|------|------|-----|-------|----|------------------------------------------------------------|-----------------------------------------------------------|---------------------|
| PA14_24690       | 476 | 0.0 | 0.0 | 9.5  | 18.0 | 0.00 | 0.00 | 5.18 | 3.78 | 0.00 | 4.48 | 0.0 | -10.0 | NA | putative D-alanyl-D-alanine carboxypeptidase               | Cell wall / LPS / capsule                                 | Periplasmic         |
| PA14_05840 gcdH  | 393 | 0.0 | 0.0 | 2.0  | 24.0 | 0.00 | 0.00 | 1.59 | 7.32 | 0.00 | 4.46 | 0.0 | -10.0 | NA | glutaryl-CoA dehydrogenase                                 | Fatty acid and phospholipid metabolism                    | Cytoplasmic         |
| PA14_46640       | 813 | 0.0 | 0.0 | 21.0 | 42.0 | 0.00 | 0.00 | 5.03 | 3.87 | 0.00 | 4.45 | 0.0 | -10.0 | NA | siderophore receptor                                       | Transport of small molecules                              | OuterMembrane       |
| PA14_61190       | 568 | 0.0 | 0.0 | 21.0 | 30.5 | 0.00 | 0.00 | 5.57 | 3.12 | 0.00 | 4.34 | 0.0 | -10.0 | NA | hypothetical protein                                       | Protein secretion/export apparatus                        | OuterMembrane       |
| PA14_57050 fabG  | 252 | 0.0 | 0.0 | 1.5  | 20.5 | 0.00 | 0.00 | 1.38 | 7.24 | 0.00 | 4.31 | 0.0 | -10.0 | NA | 3-ketoacyl-(acyl-carrier-protein) reductase                | Putative enzymes                                          | Cytoplasmic         |
| PA14_54210       | 799 | 0.0 | 0.0 | 11.5 | 46.0 | 0.00 | 0.00 | 3.35 | 5.17 | 0.00 | 4.26 | 0.0 | -10.0 | NA | putative ATP-dependent protease                            | Putative enzymes                                          | Cytoplasmic         |
| PA14_21370 fadD1 | 562 | 0.0 | 0.0 | 15.0 | 15.5 | 0.00 | 0.00 | 5.97 | 2.38 | 0.00 | 4.18 | 0.0 | -10.0 | NA | acyl-CoA synthetase                                        | Fatty acid and phospholipid metabolism                    | Cytoplasmic         |
| PA14_17960 glpK  | 505 | 0.0 | 0.0 | 10.5 | 27.0 | 0.00 | 0.00 | 4.18 | 4.14 | 0.00 | 4.16 | 0.0 | -10.0 | NA | glycerol kinase                                            | Central intermediary metabolism                           | Cytoplasmic         |
| PA14_69230 ppk   | 736 | 0.0 | 0.0 | 7.0  | 51.0 | 0.00 | 0.00 | 2.17 | 6.09 | 0.00 | 4.13 | 0.0 | -10.0 | NA | polyphosphate kinase                                       | Nucleotide biosynthesis and metabolism                    | CytoplasmicMembrane |
| PA14_26560       | 269 | 0.0 | 0.0 | 2.0  | 34.5 | 0.00 | 0.00 | 1.08 | 7.16 | 0.00 | 4.12 | 0.0 | -10.0 | NA | putative outer membrane protein precursor                  | Membrane proteins                                         | OuterMembrane       |
| PA14_51390 ppsD  | 337 | 0.0 | 0.0 | 4.0  | 9.0  | 0.00 | 0.00 | 4.37 | 3.79 | 0.00 | 4.08 | 0.0 | -10.0 | NA | 3-oxoacyl-(acyl carrier protein) synthase III              |                                                           | Cytoplasmic         |
| PA14_21340 fadD2 | 562 | 0.0 | 0.0 | 24.5 | 6.0  | 0.00 | 0.00 | 7.42 | 0.70 | 0.00 | 4.06 | 0.0 | -10.0 | NA | acyl-CoA synthetase                                        | Fatty acid and phospholipid metabolism                    | Cytoplasmic         |
| PA14_41670 ppsA  | 791 | 0.0 | 0.0 | 23.0 | 45.0 | 0.00 | 0.00 | 4.63 | 3.48 | 0.00 | 4.06 | 0.0 | -10.0 | NA | phosphoenolpyruvate synthase                               | Central intermediary metabolism                           | Cytoplasmic         |
| PA14_49800       | 329 | 0.0 | 0.0 | 10.0 | 4.0  | 0.00 | 0.00 | 7.02 | 1.08 | 0.00 | 4.05 | 0.0 | -10.0 | NA | oxidoreductase                                             | Putative enzymes                                          | Cytoplasmic         |
| PA14_11650       | 333 | 0.0 | 0.0 | 3.5  | 38.0 | 0.00 | 0.00 | 1.54 | 6.43 | 0.00 | 3.99 | 0.0 | -10.0 | NA | hypothetical protein                                       | Hypothetical, unclassified, unknown                       | Unknown             |
| PA14_00050 gyrB  | 806 | 0.0 | 0.0 | 20.5 | 17.5 | 0.00 | 0.00 | 5.99 | 1.97 | 0.00 | 3.98 | 0.0 | -10.0 | NA | DNA gyrase subunit B                                       | DNA replication, recombination, modification and repair   | Cytoplasmic         |
| PA14_01150       | 144 | 0.0 | 0.0 | 1.5  | 8.5  | 0.00 | 0.00 | 2.45 | 5.33 | 0.00 | 3.89 | 0.0 | -10.0 | NA | hypothetical protein                                       | Hypothetical, unclassified, unknown                       | Unknown             |
| PA14_51900 proS  | 571 | 0.0 | 0.0 | 16.0 | 21.0 | 0.00 | 0.00 | 5.17 | 2.61 | 0.00 | 3.89 | 0.0 | -10.0 | NA | prolyl-tRNA synthetase                                     | Translation, post-translational modification, degradation | Cytoplasmic         |
| PA14_30570       | 367 | 0.0 | 0.0 | 7.0  | 11.0 | 0.00 | 0.00 | 4.69 | 2.84 | 0.00 | 3.77 | 0.0 | -10.0 | NA | putative periplasmic spermidine/putrescine-binding protein | Transport of small molecules                              | Periplasmic         |
| PA14_13130       | 641 | 0.0 | 0.0 | 0.5  | 25.5 | 0.00 | 0.00 | 0.36 | 7.16 | 0.00 | 3.76 | 0.0 | -10.0 | NA | hypothetical protein                                       | Hypothetical, unclassified, unknown                       | OuterMembrane       |
| PA14_05000 trmB  | 223 | 0.0 | 0.0 | 3.0  | 14.0 | 0.00 | 0.00 | 2.69 | 4.82 | 0.00 | 3.75 | 0.0 | -10.0 | NA | tRNA (guanine-N(7)-)-methyltransferase                     | DNA replication, recombination, modification and repair   | Cytoplasmic         |
| PA14_30150 mmmA  | 375 | 0.0 | 0.0 | 1.5  | 32.0 | 0.00 | 0.00 | 0.81 | 6.65 | 0.00 | 3.73 | 0.0 | -10.0 | NA | tRNA-specific 2-thiouridylase MmmA                         | Transcription, RNA processing and degradation             | Cytoplasmic         |
| PA14_71840       | 733 | 0.0 | 0.0 | 19.0 | 13.5 | 0.00 | 0.00 | 5.86 | 1.60 | 0.00 | 3.73 | 0.0 | -10.0 | NA | hypothetical protein                                       | Hypothetical, unclassified, unknown                       | OuterMembrane       |
| PA14_26420       | 718 | 0.0 | 0.0 | 7.0  | 38.0 | 0.00 | 0.00 | 2.29 | 4.78 | 0.00 | 3.53 | 0.0 | -10.0 | NA | putative TonB-dependent receptor                           | Membrane proteins                                         | OuterMembrane       |
| PA14_60445 obgE  | 406 | 0.0 | 0.0 | 8.0  | 4.5  | 0.00 | 0.00 | 5.80 | 1.26 | 0.00 | 3.53 | 0.0 | -10.0 | NA | GTPase ObgE                                                |                                                           | Cytoplasmic         |
| PA14_72110       | 652 | 0.0 | 0.0 | 19.0 | 23.5 | 0.00 | 0.00 | 4.74 | 2.26 | 0.00 | 3.50 | 0.0 | -10.0 | NA | hypothetical protein                                       | Hypothetical, unclassified, unknown                       | Unknown             |
| PA14_65230 purA  | 430 | 0.0 | 0.0 | 15.0 | 24.0 | 0.00 | 0.00 | 4.20 | 2.58 | 0.00 | 3.39 | 0.0 | -10.0 | NA | adenylosuccinate synthetase                                | Nucleotide biosynthesis and metabolism                    | Cytoplasmic         |
| PA14_41360 cysS  | 460 | 0.0 | 0.0 | 9.0  | 17.5 | 0.00 | 0.00 | 3.76 | 2.81 | 0.00 | 3.29 | 0.0 | -10.0 | NA | cysteinyI-tRNA synthetase                                  | Translation, post-translational modification, degradation | Cytoplasmic         |
| PA14_01710 ahpC  | 187 | 0.0 | 0.0 | 8.0  | 15.0 | 0.00 | 0.00 | 3.79 | 2.73 | 0.00 | 3.26 | 0.0 | -10.0 | NA | alkyl hydroperoxide reductase subunit C                    | Adaptation, Protection                                    | Cytoplasmic         |
| PA14_30010 nuoB  | 225 | 0.0 | 0.0 | 1.0  | 14.0 | 0.00 | 0.00 | 1.01 | 5.47 | 0.00 | 3.24 | 0.0 | -10.0 | NA | NADH dehydrogenase subunit B                               | Energy metabolism                                         | CytoplasmicMembrane |
| PA14_49280       | 398 | 0.0 | 0.0 | 3.0  | 35.0 | 0.00 | 0.00 | 1.17 | 5.27 | 0.00 | 3.22 | 0.0 | -10.0 | NA | transglycolase                                             | Putative enzymes                                          | CytoplasmicMembrane |
| PA14_04760 coaD  | 159 | 0.0 | 0.0 | 4.0  | 10.0 | 0.00 | 0.00 | 3.24 | 3.12 | 0.00 | 3.18 | 0.0 | -10.0 | NA | phosphopantetheine adenylyltransferase                     | Central intermediary metabolism                           | Cytoplasmic         |
| PA14_22830       | 209 | 0.0 | 0.0 | 1.0  | 14.0 | 0.00 | 0.00 | 0.99 | 5.34 | 0.00 | 3.17 | 0.0 | -10.0 | NA | SUA5/YciO/YrdC/YwIC family protein                         | Translation, post-translational modification, degradation | Cytoplasmic         |
| PA14_00210       | 341 | 0.0 | 0.0 | 4.0  | 23.0 | 0.00 | 0.00 | 1.96 | 4.33 | 0.00 | 3.15 | 0.0 | -10.0 | NA | lysine domain-containing protein                           | Putative enzymes                                          | Unknown             |
| PA14_07230 lda   | 354 | 0.0 | 0.0 | 6.0  | 21.5 | 0.00 | 0.00 | 2.60 | 3.59 | 0.00 | 3.10 | 0.0 | -10.0 | NA | fructose-1,6-bisphosphate aldolase                         | Carbon compound catabolism                                | Cytoplasmic         |
| PA14_01550       | 166 | 0.0 | 0.0 | 2.0  | 12.0 | 0.00 | 0.00 | 1.83 | 4.24 | 0.00 | 3.04 | 0.0 | -10.0 | NA | putative lipoprotein                                       | Fatty acid and phospholipid metabolism                    | Unknown             |
| PA14_32420       | 339 | 0.0 | 0.0 | 7.5  | 4.0  | 0.00 | 0.00 | 4.99 | 1.02 | 0.00 | 3.01 | 0.0 | -10.0 | NA | putative oxidoreductase                                    | Energy metabolism                                         | Cytoplasmic         |
| PA14_60190 cipB  | 854 | 0.0 | 0.0 | 24.0 | 39.5 | 0.00 | 0.00 | 3.63 | 2.30 | 0.00 | 2.96 | 0.0 | -10.0 | NA | cipB protein                                               | Chaperones & heat shock proteins                          | Cytoplasmic         |
| PA14_43690 fabB  | 405 | 0.0 | 0.0 | 4.0  | 10.0 | 0.00 | 0.00 | 2.98 | 2.86 | 0.00 | 2.92 | 0.0 | -10.0 | NA | 3-oxoacyl-(acyl carrier protein) synthase I                | Fatty acid and phospholipid metabolism                    | Cytoplasmic         |
| PA14_09115 rpoA  | 333 | 0.0 | 0.0 | 12.0 | 14.5 | 0.00 | 0.00 | 3.84 | 1.79 | 0.00 | 2.81 | 0.0 | -10.0 | NA | DNA-directed RNA polymerase subunit alpha                  | Transcription, RNA processing and degradation             | Cytoplasmic         |
| PA14_67450 blc   | 189 | 0.0 | 0.0 | 5.0  | 8.0  | 0.00 | 0.00 | 3.44 | 2.12 | 0.00 | 2.78 | 0.0 | -10.0 | NA | outer membrane lipoprotein Blc                             | Cell wall / LPS / capsule                                 | OuterMembrane       |
| PA14_54640       | 272 | 0.0 | 0.0 | 4.0  | 12.0 | 0.00 | 0.00 | 2.56 | 2.96 | 0.00 | 2.76 | 0.0 | -10.0 | NA | enoyl-CoA hydratase                                        | Putative enzymes                                          | CytoplasmicMembrane |
| PA14_56240 pykA  | 483 | 0.0 | 0.0 | 4.0  | 27.5 | 0.00 | 0.00 | 1.51 | 4.00 | 0.00 | 2.76 | 0.0 | -10.0 | NA | pyruvate kinase                                            | Energy metabolism                                         | Cytoplasmic         |
| PA14_50220 fleQ  | 490 | 0.0 | 0.0 | 5.0  | 10.5 | 0.00 | 0.00 | 3.04 | 2.46 | 0.00 | 2.75 | 0.0 | -10.0 | NA | transcriptional regulator FleQ                             | Transcriptional regulators                                | Cytoplasmic         |
| PA14_35530 bkdA1 | 410 | 0.0 | 0.0 | 1.0  | 15.0 | 0.00 | 0.00 | 0.80 | 4.61 | 0.00 | 2.71 | 0.0 | -10.0 | NA | 2-oxoisovalerate dehydrogenase (alpha subunit)             | Amino acid biosynthesis and metabolism                    | Cytoplasmic         |
| PA14_54480       | 314 | 0.0 | 0.0 | 1.0  | 17.5 | 0.00 | 0.00 | 0.70 | 4.72 | 0.00 | 2.71 | 0.0 | -10.0 | NA | hypothetical protein                                       | Hypothetical, unclassified, unknown                       | Unknown             |

|                  |     |     |     |      |      |      |      |      |      |      |      |     |       |    |                                                                         |                                                           |                     |
|------------------|-----|-----|-----|------|------|------|------|------|------|------|------|-----|-------|----|-------------------------------------------------------------------------|-----------------------------------------------------------|---------------------|
| PA14_70860       | 323 | 0.0 | 0.0 | 6.0  | 5.5  | 0.00 | 0.00 | 4.00 | 1.41 | 0.00 | 2.71 | 0.0 | -10.0 | NA | hypothetical protein                                                    | Transport of small molecules                              | CytoplasmicMembrane |
| PA14_64110 jaccC | 449 | 0.0 | 0.0 | 13.0 | 9.5  | 0.00 | 0.00 | 4.19 | 1.18 | 0.00 | 2.68 | 0.0 | -10.0 | NA | acetyl-CoA carboxylase biotin carboxylase subunit                       | Fatty acid and phospholipid metabolism                    | Cytoplasmic         |
| PA14_61590       | 305 | 0.0 | 0.0 | 2.0  | 9.0  | 0.00 | 0.00 | 1.92 | 3.33 | 0.00 | 2.62 | 0.0 | -10.0 | NA | hypothetical protein                                                    | Putative enzymes                                          | Cytoplasmic         |
| PA14_27160 tesA  | 201 | 0.0 | 0.0 | 3.0  | 4.0  | 0.00 | 0.00 | 3.40 | 1.74 | 0.00 | 2.57 | 0.0 | -10.0 | NA | acyl-CoA thioesterase I precursor                                       | Fatty acid and phospholipid metabolism                    | Periplasmic         |
| PA14_62230       | 520 | 0.0 | 0.0 | 6.0  | 22.0 | 0.00 | 0.00 | 2.10 | 2.97 | 0.00 | 2.53 | 0.0 | -10.0 | NA | hypothetical protein                                                    | Hypothetical, unclassified, unknown                       | Cytoplasmic         |
| PA14_63990 speA  | 636 | 0.0 | 0.0 | 10.0 | 7.0  | 0.00 | 0.00 | 3.97 | 1.07 | 0.00 | 2.52 | 0.0 | -10.0 | NA | arginine decarboxylase                                                  | Amino acid biosynthesis and metabolism                    | Unknown             |
| PA14_24360       | 974 | 0.0 | 0.0 | 5.0  | 57.0 | 0.00 | 0.00 | 0.92 | 4.05 | 0.00 | 2.49 | 0.0 | -10.0 | NA | hypothetical protein                                                    | Putative enzymes                                          | OuterMembrane       |
| PA14_26540       | 282 | 0.0 | 0.0 | 1.0  | 17.0 | 0.00 | 0.00 | 0.65 | 4.26 | 0.00 | 2.45 | 0.0 | -10.0 | NA | hypothetical protein                                                    | Hypothetical, unclassified, unknown                       | Unknown             |
| PA14_67090 mdoG  | 525 | 0.0 | 0.0 | 3.0  | 24.5 | 0.00 | 0.00 | 1.16 | 3.64 | 0.00 | 2.40 | 0.0 | -10.0 | NA | glucan biosynthesis protein G                                           | Putative enzymes                                          | Periplasmic         |
| PA14_16530 lysS  | 501 | 0.0 | 0.0 | 10.0 | 15.0 | 0.00 | 0.00 | 3.00 | 1.73 | 0.00 | 2.37 | 0.0 | -10.0 | NA | lysyl-tRNA synthetase                                                   | Translation, post-translational modification, degradation | Cytoplasmic         |
| PA14_38080       | 624 | 0.0 | 0.0 | 10.0 | 9.0  | 0.00 | 0.00 | 3.46 | 1.20 | 0.00 | 2.33 | 0.0 | -10.0 | NA | hypothetical protein                                                    | Transport of small molecules                              | OuterMembrane       |
| PA14_70140       | 497 | 0.0 | 0.0 | 5.0  | 11.5 | 0.00 | 0.00 | 2.48 | 2.19 | 0.00 | 2.33 | 0.0 | -10.0 | NA | putative aldehyde dehydrogenase                                         | Putative enzymes                                          | Cytoplasmic         |
| PA14_67560 typA  | 605 | 0.0 | 0.0 | 6.0  | 10.0 | 0.00 | 0.00 | 2.83 | 1.82 | 0.00 | 2.32 | 0.0 | -10.0 | NA | GTP-binding protein TypA/BipA                                           | Adaptation, Protection                                    | CytoplasmicMembrane |
| PA14_61820       | 366 | 0.0 | 0.0 | 7.0  | 8.0  | 0.00 | 0.00 | 3.12 | 1.37 | 0.00 | 2.25 | 0.0 | -10.0 | NA | GTP-dependent nucleic acid-binding protein EngD                         | Translation, post-translational modification, degradation | Cytoplasmic         |
| PA14_17190 fabZ  | 146 | 0.0 | 0.0 | 2.0  | 3.0  | 0.00 | 0.00 | 2.77 | 1.60 | 0.00 | 2.19 | 0.0 | -10.0 | NA | (3R)-hydroxymyristoyl-ACP dehydratase                                   | Fatty acid and phospholipid metabolism                    | Cytoplasmic         |
| PA14_57410 murE  | 487 | 0.0 | 0.0 | 10.0 | 2.0  | 0.00 | 0.00 | 4.00 | 0.31 | 0.00 | 2.16 | 0.0 | -10.0 | NA | UDP-N-acetylmuramoylalanyl-D-glutamate-2, 6-diaminopimelate ligase      | Cell wall / LPS / capsule                                 | Cytoplasmic         |
| PA14_66170       | 585 | 0.0 | 0.0 | 8.0  | 9.0  | 0.00 | 0.00 | 3.01 | 1.30 | 0.00 | 2.16 | 0.0 | -10.0 | NA | putative carbamoyl transferase                                          | Central intermediary metabolism                           | Cytoplasmic         |
| PA14_22460       | 275 | 0.0 | 0.0 | 4.0  | 7.0  | 0.00 | 0.00 | 2.56 | 1.72 | 0.00 | 2.14 | 0.0 | -10.0 | NA | alpha/beta family hydrolase                                             | Putative enzymes                                          | Cytoplasmic         |
| PA14_30240 infA  | 72  | 0.0 | 0.0 | 1.0  | 2.0  | 0.00 | 0.00 | 2.38 | 1.83 | 0.00 | 2.10 | 0.0 | -10.0 | NA | translation initiation factor IF-1                                      | Translation, post-translational modification, degradation | Cytoplasmic         |
| PA14_21990       | 429 | 0.0 | 0.0 | 3.0  | 12.0 | 0.00 | 0.00 | 1.65 | 2.54 | 0.00 | 2.09 | 0.0 | -10.0 | NA | putative aminopeptidase 2                                               | Amino acid biosynthesis and metabolism                    | Cytoplasmic         |
| PA14_38480 gnyA  | 655 | 0.0 | 0.0 | 8.0  | 8.0  | 0.00 | 0.00 | 3.00 | 1.16 | 0.00 | 2.08 | 0.0 | -10.0 | NA | alpha subunit of geranyl-CoA carboxylase, GnyA                          | Carbon compound catabolism                                | Cytoplasmic         |
| PA14_24300       | 455 | 0.0 | 0.0 | 3.0  | 13.0 | 0.00 | 0.00 | 1.46 | 2.44 | 0.00 | 1.95 | 0.0 | -10.0 | NA | hypothetical protein                                                    | Hypothetical, unclassified, unknown                       | Unknown             |
| PA14_23330 rpsA  | 559 | 0.0 | 0.0 | 12.5 | 27.0 | 0.00 | 0.00 | 2.12 | 1.76 | 0.00 | 1.94 | 0.0 | -10.0 | NA | 30S ribosomal protein S1                                                | Translation, post-translational modification, degradation | Cytoplasmic         |
| PA14_58150  mreB | 345 | 0.0 | 0.0 | 5.0  | 11.5 | 0.00 | 0.00 | 2.04 | 1.81 | 0.00 | 1.92 | 0.0 | -10.0 | NA | rod shape-determining protein MreB                                      | Cell wall / LPS / capsule                                 | Cytoplasmic         |
| PA14_65270  hflC | 289 | 0.0 | 0.0 | 5.0  | 7.0  | 0.00 | 0.00 | 2.50 | 1.34 | 0.00 | 1.92 | 0.0 | -10.0 | NA | protease subunit HflC                                                   | Translation, post-translational modification, degradation | Cytoplasmic         |
| PA14_27230       | 151 | 0.0 | 0.0 | 1.5  | 2.0  | 0.00 | 0.00 | 2.52 | 1.29 | 0.00 | 1.91 | 0.0 | -10.0 | NA | MarR family transcriptional regulator                                   | Transcriptional regulators                                | Cytoplasmic         |
| PA14_18670 bfrB  | 158 | 0.0 | 0.0 | 1.0  | 3.0  | 0.00 | 0.00 | 1.77 | 2.04 | 0.00 | 1.90 | 0.0 | -10.0 | NA | bacterioferritin                                                        | Transport of small molecules                              | Cytoplasmic         |
| PA14_33000 gcvP2 | 959 | 0.0 | 0.0 | 7.0  | 6.0  | 0.00 | 0.00 | 2.85 | 0.94 | 0.00 | 1.90 | 0.0 | -10.0 | NA | glycine dehydrogenase                                                   | Amino acid biosynthesis and metabolism                    | Cytoplasmic         |
| PA14_06870 dnr   | 227 | 0.0 | 0.0 | 1.0  | 12.0 | 0.00 | 0.00 | 0.67 | 3.10 | 0.00 | 1.88 | 0.0 | -10.0 | NA | transcriptional regulator Dnr                                           | Transcriptional regulators                                | Cytoplasmic         |
| PA14_70560       | 310 | 0.0 | 0.0 | 5.5  | 2.0  | 0.00 | 0.00 | 3.28 | 0.46 | 0.00 | 1.87 | 0.0 | -10.0 | NA | LysR family transcriptional regulator                                   | Transcriptional regulators                                | Cytoplasmic         |
| PA14_62770 nusA  | 493 | 0.0 | 0.0 | 7.0  | 2.0  | 0.00 | 0.00 | 3.29 | 0.36 | 0.00 | 1.83 | 0.0 | -10.0 | NA | transcription elongation factor NusA                                    | Transcription, RNA processing and degradation             | Cytoplasmic         |
| PA14_62350       | 764 | 0.0 | 0.0 | 8.0  | 22.5 | 0.00 | 0.00 | 1.71 | 1.85 | 0.00 | 1.78 | 0.0 | -10.0 | NA | putative haem/haemoglobin uptake outer membrane receptor PhuR precursor | Transport of small molecules                              | OuterMembrane       |
| PA14_33040 gcvT2 | 373 | 0.0 | 0.0 | 2.0  | 9.0  | 0.00 | 0.00 | 1.30 | 2.25 | 0.00 | 1.77 | 0.0 | -10.0 | NA | glycine cleavage system protein T2                                      | Amino acid biosynthesis and metabolism                    | Cytoplasmic         |
| PA14_00670       | 168 | 0.0 | 0.0 | 2.0  | 3.0  | 0.00 | 0.00 | 2.18 | 1.26 | 0.00 | 1.72 | 0.0 | -10.0 | NA | hypothetical protein                                                    | Hypothetical, unclassified, unknown                       | Cytoplasmic         |
| PA14_45640 fleN  | 280 | 0.0 | 0.0 | 1.0  | 9.5  | 0.00 | 0.00 | 0.71 | 2.61 | 0.00 | 1.66 | 0.0 | -10.0 | NA | flagellar synthesis regulator FleN                                      | Motility & Attachment                                     | CytoplasmicMembrane |
| PA14_43650       | 705 | 0.0 | 0.0 | 2.0  | 22.5 | 0.00 | 0.00 | 0.62 | 2.68 | 0.00 | 1.65 | 0.0 | -10.0 | NA | hypothetical protein                                                    | Membrane proteins                                         | OuterMembrane       |
| PA14_04660       | 274 | 0.0 | 0.0 | 2.0  | 4.0  | 0.00 | 0.00 | 1.79 | 1.38 | 0.00 | 1.58 | 0.0 | -10.0 | NA | hypothetical protein                                                    | Two-component regulatory systems                          | Unknown             |
| PA14_09550       | 388 | 0.0 | 0.0 | 1.0  | 15.5 | 0.00 | 0.00 | 0.45 | 2.71 | 0.00 | 1.58 | 0.0 | -10.0 | NA | hypothetical protein                                                    | Carbon compound catabolism                                | Unknown             |
| PA14_50860       | 269 | 0.0 | 0.0 | 4.0  | 5.0  | 0.00 | 0.00 | 2.02 | 0.97 | 0.00 | 1.49 | 0.0 | -10.0 | NA | hypothetical protein                                                    | Hypothetical, unclassified, unknown                       | Unknown             |
| PA14_04510       | 459 | 0.0 | 0.0 | 6.0  | 4.0  | 0.00 | 0.00 | 2.34 | 0.60 | 0.00 | 1.47 | 0.0 | -10.0 | NA | hypothetical protein                                                    | Hypothetical, unclassified, unknown                       | Cytoplasmic         |
| PA14_58630       | 387 | 0.0 | 0.0 | 2.0  | 12.0 | 0.00 | 0.00 | 0.85 | 1.96 | 0.00 | 1.41 | 0.0 | -10.0 | NA | ornithine decarboxylase                                                 | Amino acid biosynthesis and metabolism                    | Cytoplasmic         |
| PA14_51930       | 154 | 0.0 | 0.0 | 1.0  | 6.0  | 0.00 | 0.00 | 0.84 | 1.93 | 0.00 | 1.39 | 0.0 | -10.0 | NA | thioredoxin                                                             | Putative enzymes                                          | Periplasmic         |
| PA14_68190 rmlD  | 302 | 0.0 | 0.0 | 2.0  | 6.0  | 0.00 | 0.00 | 1.28 | 1.48 | 0.00 | 1.38 | 0.0 | -10.0 | NA | dTDP-4-dehydrohamnose reductase                                         | Cell wall / LPS / capsule                                 | Cytoplasmic         |
| PA14_06600       | 601 | 0.0 | 0.0 | 0.5  | 14.0 | 0.00 | 0.00 | 0.23 | 2.46 | 0.00 | 1.35 | 0.0 | -10.0 | NA | putative acyl-CoA dehydrogenase                                         | Fatty acid and phospholipid metabolism                    | Cytoplasmic         |

|                  |      |        |         |         |         |        |        |        |        |        |        |     |       |    |                                                                                                       |                                                           |                     |
|------------------|------|--------|---------|---------|---------|--------|--------|--------|--------|--------|--------|-----|-------|----|-------------------------------------------------------------------------------------------------------|-----------------------------------------------------------|---------------------|
| PA14_03430 gabD  | 483  | 0.0    | 0.0     | 5.0     | 3.5     | 0.00   | 0.00   | 2.10   | 0.57   | 0.00   | 1.34   | 0.0 | -10.0 | NA | succinate-semialdehyde dehydrogenase I                                                                | Central intermediary metabolism                           | Cytoplasmic         |
| PA14_19370       | 589  | 0.0    | 0.0     | 7.0     | 5.5     | 0.00   | 0.00   | 2.02   | 0.61   | 0.00   | 1.32   | 0.0 | -10.0 | NA | putative asparagine synthetase, glutamine-hydrolyzing                                                 | Amino acid biosynthesis and metabolism                    | Cytoplasmic         |
| PA14_62270       | 295  | 0.0    | 0.0     | 2.0     | 2.0     | 0.00   | 0.00   | 1.86   | 0.72   | 0.00   | 1.29   | 0.0 | -10.0 | NA | hypothetical protein                                                                                  | Hypothetical, unclassified, unknown                       | Unknown             |
| PA14_60410       | 154  | 0.0    | 0.0     | 1.0     | 5.0     | 0.00   | 0.00   | 0.87   | 1.67   | 0.00   | 1.27   | 0.0 | -10.0 | NA | hypothetical protein                                                                                  | Hypothetical, unclassified, unknown                       | Unknown             |
| PA14_27755       | 206  | 0.0    | 0.0     | 1.0     | 5.0     | 0.00   | 0.00   | 0.84   | 1.62   | 0.00   | 1.23   | 0.0 | -10.0 | NA | glutathione S-transferase                                                                             | Central intermediary metabolism                           | Cytoplasmic         |
| PA14_15740 purL  | 1298 | 0.0    | 0.0     | 4.5     | 21.0    | 0.00   | 0.00   | 0.87   | 1.56   | 0.00   | 1.22   | 0.0 | -10.0 | NA | phosphoribosylformylglycinamide synthase                                                              | Nucleotide biosynthesis and metabolism                    | Cytoplasmic         |
| PA14_68070       | 250  | 0.0    | 0.0     | 1.0     | 7.0     | 0.00   | 0.00   | 0.63   | 1.70   | 0.00   | 1.17   | 0.0 | -10.0 | NA | amino acid (lysine/arginine/ornithine/histidine/octopine) ABC transporter periplasmic binding protein | Transport of small molecules                              | Periplasmic         |
| PA14_23110       | 386  | 0.0    | 0.0     | 2.0     | 3.0     | 0.00   | 0.00   | 1.43   | 0.82   | 0.00   | 1.13   | 0.0 | -10.0 | NA | hypothetical protein                                                                                  | Translation, post-translational modification, degradation | Cytoplasmic         |
| PA14_06450       | 458  | 0.0    | 0.0     | 2.0     | 9.0     | 0.00   | 0.00   | 0.80   | 1.38   | 0.00   | 1.09   | 0.0 | -10.0 | NA | acetyl-CoA carboxylase biotin carboxylase subunit                                                     | Fatty acid and phospholipid metabolism                    | Cytoplasmic         |
| PA14_20870       | 728  | 0.0    | 0.0     | 3.0     | 11.0    | 0.00   | 0.00   | 0.88   | 1.24   | 0.00   | 1.06   | 0.0 | -10.0 | NA | hypothetical protein                                                                                  | Cell wall / LPS / capsule                                 | OuterMembrane       |
| PA14_14700 cysE  | 258  | 0.0    | 0.0     | 2.0     | 1.5     | 0.00   | 0.00   | 1.62   | 0.47   | 0.00   | 1.04   | 0.0 | -10.0 | NA | serine O-acetyltransferase                                                                            | Amino acid biosynthesis and metabolism                    | Cytoplasmic         |
| PA14_27370       | 567  | 0.0    | 0.0     | 2.5     | 12.5    | 0.00   | 0.00   | 0.70   | 1.35   | 0.00   | 1.03   | 0.0 | -10.0 | NA | ATP-dependent RNA helicase                                                                            | Transcription, RNA processing and degradation             | Cytoplasmic         |
| PA14_43970 lpdG  | 478  | 0.0    | 0.0     | 1.5     | 11.0    | 0.00   | 0.00   | 0.52   | 1.48   | 0.00   | 1.00   | 0.0 | -10.0 | NA | dihydroilpoamide dehydrogenase                                                                        | Energy metabolism                                         | Cytoplasmic         |
| PA14_52180 reiA  | 747  | 0.0    | 0.0     | 4.0     | 16.0    | 0.00   | 0.00   | 0.79   | 1.21   | 0.00   | 1.00   | 0.0 | -10.0 | NA | GTP pyrophosphokinase                                                                                 | Adaptation, Protection                                    | Cytoplasmic         |
| PA14_38460 gnyB  | 535  | 0.0    | 0.0     | 1.0     | 10.0    | 0.00   | 0.00   | 0.40   | 1.54   | 0.00   | 0.97   | 0.0 | -10.0 | NA | acyl-CoA carboxyltransferase beta chain                                                               | Carbon compound catabolism                                | CytoplasmicMembrane |
| PA14_21890       | 320  | 0.0    | 0.0     | 2.0     | 5.0     | 0.00   | 0.00   | 0.98   | 0.94   | 0.00   | 0.96   | 0.0 | -10.0 | NA | putative oxidoreductase                                                                               | Energy metabolism                                         | CytoplasmicMembrane |
| PA14_25900       | 398  | 0.0    | 0.0     | 3.0     | 10.0    | 0.00   | 0.00   | 0.84   | 1.08   | 0.00   | 0.96   | 0.0 | -10.0 | NA | trans-2-enoyl-CoA reductase                                                                           | Putative enzymes                                          | Cytoplasmic         |
| PA14_23970 xcpQ  | 658  | 0.0    | 0.0     | 2.0     | 6.0     | 0.00   | 0.00   | 0.83   | 0.96   | 0.00   | 0.89   | 0.0 | -10.0 | NA | general secretion pathway protein D                                                                   | Protein secretion/export apparatus                        | OuterMembrane       |
| PA14_66910       | 208  | 0.0    | 0.0     | 1.0     | 2.0     | 0.00   | 0.00   | 0.91   | 0.70   | 0.00   | 0.80   | 0.0 | -10.0 | NA | hypothetical protein                                                                                  | Hypothetical, unclassified, unknown                       | Unknown             |
| PA14_50570       | 764  | 0.0    | 0.0     | 1.0     | 12.0    | 0.00   | 0.00   | 0.28   | 1.29   | 0.00   | 0.78   | 0.0 | -10.0 | NA | hypothetical protein                                                                                  | Hypothetical, unclassified, unknown                       | Cytoplasmic         |
| PA14_07870       | 348  | 0.0    | 0.0     | 2.0     | 1.0     | 0.00   | 0.00   | 1.18   | 0.23   | 0.00   | 0.70   | 0.0 | -10.0 | NA | putative binding protein component of ABC transporter                                                 | Transport of small molecules                              | Periplasmic         |
| PA14_11350       | 220  | 0.0    | 0.0     | 1.0     | 1.0     | 0.00   | 0.00   | 1.01   | 0.39   | 0.00   | 0.70   | 0.0 | -10.0 | NA | hypothetical protein                                                                                  | Hypothetical, unclassified, unknown                       | Cytoplasmic         |
| PA14_72380 algB  | 449  | 0.0    | 0.0     | 2.0     | 3.0     | 0.00   | 0.00   | 0.88   | 0.51   | 0.00   | 0.70   | 0.0 | -10.0 | NA | two-component response regulator AlgB                                                                 | Two-component regulatory systems                          | Cytoplasmic         |
| PA14_11320       | 196  | 0.0    | 0.0     | 1.0     | 1.0     | 0.00   | 0.00   | 0.99   | 0.38   | 0.00   | 0.69   | 0.0 | -10.0 | NA | hypothetical protein                                                                                  | Hypothetical, unclassified, unknown                       | Unknown             |
| PA14_44630 dnaX  | 701  | 0.0    | 0.0     | 3.0     | 1.0     | 0.00   | 0.00   | 1.19   | 0.15   | 0.00   | 0.67   | 0.0 | -10.0 | NA | DNA polymerase III subunits gamma and tau                                                             | DNA replication, recombination, modification and repair   | CytoplasmicMembrane |
| PA14_54180       | 687  | 0.0    | 0.0     | 4.0     | 1.0     | 0.00   | 0.00   | 1.22   | 0.12   | 0.00   | 0.67   | 0.0 | -10.0 | NA | hypothetical protein                                                                                  | Hypothetical, unclassified, unknown                       | OuterMembrane       |
| PA14_17260 dnaE  | 1173 | 0.0    | 0.0     | 2.0     | 12.0    | 0.00   | 0.00   | 0.38   | 0.88   | 0.00   | 0.63   | 0.0 | -10.0 | NA | DNA polymerase III subunit alpha                                                                      | DNA replication, recombination, modification and repair   | Cytoplasmic         |
| PA14_30630 pqsH  | 382  | 0.0    | 0.0     | 1.0     | 3.5     | 0.00   | 0.00   | 0.54   | 0.73   | 0.00   | 0.63   | 0.0 | -10.0 | NA | putative FAD-dependent monooxygenase                                                                  | Biosynthesis of cofactors, prosthetic groups and carriers | Cytoplasmic         |
| PA14_11890       | 213  | 0.0    | 0.0     | 1.0     | 2.0     | 0.00   | 0.00   | 0.70   | 0.54   | 0.00   | 0.62   | 0.0 | -10.0 | NA | hypothetical protein                                                                                  | Hypothetical, unclassified, unknown                       | Cytoplasmic         |
| PA14_05390 chpA  | 2476 | 0.0    | 0.0     | 3.5     | 10.0    | 0.00   | 0.00   | 0.48   | 0.53   | 0.00   | 0.51   | 0.0 | -10.0 | NA | ChpA                                                                                                  | Chemotaxis                                                | Cytoplasmic         |
| PA14_25400       | 240  | 0.0    | 0.0     | 0.5     | 2.0     | 0.00   | 0.00   | 0.38   | 0.58   | 0.00   | 0.48   | 0.0 | -10.0 | NA | putative phosphodiesterase                                                                            | Central intermediary metabolism                           | Cytoplasmic         |
| PA14_72490 polA  | 913  | 0.0    | 0.0     | 2.0     | 5.0     | 0.00   | 0.00   | 0.47   | 0.46   | 0.00   | 0.46   | 0.0 | -10.0 | NA | DNA polymerase I                                                                                      | DNA replication, recombination, modification and repair   | Cytoplasmic         |
| PA14_08820 fusA1 | 706  | 0.0    | 0.0     | 1.0     | 12.0    | 0.00   | 0.00   | 0.15   | 0.69   | 0.00   | 0.42   | 0.0 | -10.0 | NA | elongation factor G                                                                                   | Transcription, RNA processing and degradation             | Cytoplasmic         |
| PA14_02220       | 679  | 0.0    | 0.0     | 2.5     | 1.0     | 0.00   | 0.00   | 0.72   | 0.11   | 0.00   | 0.41   | 0.0 | -10.0 | NA | putative chemotaxis transducer                                                                        | Chemotaxis                                                | CytoplasmicMembrane |
| PA14_52230       | 742  | 0.0    | 0.0     | 1.0     | 5.0     | 0.00   | 0.00   | 0.27   | 0.52   | 0.00   | 0.39   | 0.0 | -10.0 | NA | outer membrane receptor FepA                                                                          | Transport of small molecules                              | OuterMembrane       |
| PA14_66620 pilQ  | 710  | 0.0    | 0.0     | 1.5     | 5.0     | 0.00   | 0.00   | 0.34   | 0.44   | 0.00   | 0.39   | 0.0 | -10.0 | NA | type 4 fimbrial biogenesis outer membrane protein PilQ precursor                                      | Motility & Attachment                                     | OuterMembrane       |
| PA14_18260 fruK  | 314  | 0.0    | 0.0     | 1.0     | 1.0     | 0.00   | 0.00   | 0.51   | 0.20   | 0.00   | 0.36   | 0.0 | -10.0 | NA | 1-phosphofructokinase                                                                                 | Transport of small molecules                              | Cytoplasmic         |
| PA14_09460 phzC1 | 405  | 0.0    | 0.0     | 0.5     | 2.0     | 0.00   | 0.00   | 0.25   | 0.38   | 0.00   | 0.31   | 0.0 | -10.0 | NA | phenazine biosynthesis protein PhzC                                                                   | Secreted Factors (toxins, enzymes, alginate)              | Cytoplasmic         |
| PA14_39945 phzC2 | 405  | 0.0    | 0.0     | 0.5     | 2.0     | 0.00   | 0.00   | 0.25   | 0.38   | 0.00   | 0.31   | 0.0 | -10.0 | NA | phenazine biosynthesis protein PhzC                                                                   | Secreted Factors (toxins, enzymes, alginate)              | Cytoplasmic         |
| PA14_00120       | 295  | 0.0    | 0.0     | 1.0     | 0.5     | 0.00   | 0.00   | 0.50   | 0.10   | 0.00   | 0.30   | 0.0 | -10.0 | NA | lipid A biosynthesis lauroyl acyltransferase                                                          | Cell wall / LPS / capsule                                 | CytoplasmicMembrane |
| PA14_23500 tyrB  | 398  | 0.0    | 0.0     | 1.0     | 1.0     | 0.00   | 0.00   | 0.37   | 0.14   | 0.00   | 0.25   | 0.0 | -10.0 | NA | aromatic amino acid aminotransferase                                                                  | Amino acid biosynthesis and metabolism                    | Cytoplasmic         |
|                  |      | 4954.5 | 15900.0 | 16288.0 | 34456.0 | 9924.6 | 9339.2 | 9920.0 | 8891.4 | 9631.9 | 9405.7 |     |       |    |                                                                                                       |                                                           |                     |
